# Supplementary material for: Comprehensive expression profiles of CircRNAs, LncRNAs, and mRNAs in PBMCs from patients with the ossification of the posterior longitudinal ligament
Source: Royal Society of Chemistry journal article supplement (doi:10.1039/d1mo00060h), 2021-05-31
Supplement: d1mo00060h4.pdf [file d1mo00060h4.pdf]

**S1 Table 1. GO enrichment analysis about mRNA**

| GO_ID      | Description                           | GeneRatio | pvalue   | qvalue   | geneID                                                                                                                                                                                                                                                                                                                                                           | GO_domain          |
|------------|---------------------------------------|-----------|----------|----------|------------------------------------------------------------------------------------------------------------------------------------------------------------------------------------------------------------------------------------------------------------------------------------------------------------------------------------------------------------------|--------------------|
| GO:005090  | leukocyte migration                   | 49/875    | 1.85E-10 | 7.48E-07 | ATP1B2/AZU1/CCL3/CCR2/CCR5/CCR7/CD34/CD58/CEACAM1/CEACAM6/CEACAM8/CMKLR1/CX3CR1/CXCL10/CXCL2/CXCL5/CXCR1/CXCR2/CXCR4/ELANE/EPS8/GCSAM/GPR15/ICAM1/IFNG/IL12A/IL6/ITGA1/ITGAV/ITGAX/LGALS9/MERTK/OLR1/P2RY12/PDE4B/PDGFB/PF4/PODXL2/PPBP/PROS1/PTGER4/ROCK1/RPS19/SBDS/SIRPG/SLC7A5/SPNS2/TNF/TRPM4                                                               | Biological Process |
| GO:0009617 | response to bacterium                 | 61/875    | 6.84E-10 | 1.38E-06 | ALPL/AZU1/BMP6/BPI/CAMP/CCL3/CCR5/CCR7/CD180/CLEC4D/COCH/CTSG/CX3CR1/CXCL10/CXCL2/CXCL5/DEFA1/DEFA1B/DEFA3/DEFA4/ELANE/EPPIN/FASLG/GNLY/HLA-DRB5/ICAM1/IFNG/IL12A/IL6/IRAK3/ISG15/JUND/LCN2/LGALS9/LTF/MAPK14/MAPK3/MUC5B/NCF1/NLRC4/NLRP6/PDE4B/PF4/PGLYRP1/PLD1/PPBP/PRDM1/PROS1/PTGER4/RBPJ/RIPK2/SLPI/SOCS1/SPARC/TICAM2/TLR1/TLR5/TNF/TNFAIP3/TNFSF4/TNFSF8 | Biological Process |
| GO:0031640 | killing of cells of other organism    | 12/875    | 1.60E-08 | 1.62E-05 | BCL2L11/CAMP/CTSG/DEFA1/DEFA1B/DEFA3/DEFA4/ELANE/FCER2/GNLY/IFNG/NCF1                                                                                                                                                                                                                                                                                            | Biological Process |
| GO:0044364 | disruption of cells of other organism | 12/875    | 1.60E-08 | 1.62E-05 | BCL2L11/CAMP/CTSG/DEFA1/DEFA1B/DEFA3/DEFA4/ELANE/FCER2/GNLY/IFNG/NCF1                                                                                                                                                                                                                                                                                            | Biological Process |
| GO:0050663 | cytokine secretion                    | 25/875    | 5.15E-07 | 0.000298 | AIM2/ALOX15B/CAMP/CASP5/CCL3/CCR7/CD34/CD58/CHI3L1/CLEC5A/HLA-DRB5/IFNG/IL6/LGALS9/MAPK14/NLRC4/PTGER4/RBPJ/SCAMP5/SOCS1/TLR1/TLR10/TNF/TNFRSF21/TNFSF4                                                                                                                                                                                                          | Biological Process |
| GO:0071216 | cellular response to biotic stimulus  | 25/875    | 1.71E-06 | 0.000577 | APAF1/BMP6/CCL3/CCR5/CD180/CX3CR1/CXCL10/ICAM1/IFNG/IL12A/IL6/LCN2/LTF/MAPK14/MAPK3/PDE4B/PRDM1/RIPK2/TICAM2/TLR1/TLR5/TNF/TNFAIP3/TNFSF4/TXNIP                                                                                                                                                                                                                  | Biological Process |
| GO:0050707 | regulation of cytokine secretion      | 22/875    | 2.02E-06 | 0.000594 | AIM2/ALOX15B/CAMP/CASP5/CCL3/CCR7/CD34/CD58/CLEC5A/HLA-DRB5/IFNG/IL6/LGALS9/MAPK14/PTGER4/SCAMP5/SOCS1/TLR1/TLR10/TNF/TNFRSF21/TNFSF4                                                                                                                                                                                                                            | Biological Process |
| GO:0006914 | cellular defense                      | 14/875    | 2.67E-06 | 0.000691 | CCR2/CCR3/CCR5/CLEC5A/CX3CR1/CXCR2/GNLY/ITK/KIR3DL2/KLRC2/KLRG1/LGALS3BP/N                                                                                                                                                                                                                                                                                       | Biological Process |

|            |                                                    |        |          |          |                                                                                                                                                      |                       |
|------------|----------------------------------------------------|--------|----------|----------|------------------------------------------------------------------------------------------------------------------------------------------------------|-----------------------|
| 68         | response                                           |        |          |          | CF1/SH2D1A                                                                                                                                           | Process               |
| GO:0001906 | cell killing                                       | 19/875 | 3.02E-06 | 0.000691 | BCL2L11/CAMP/CTSG/DEFA1/DEFA1B/DEFA3/DEFA4/ELANE/FCER2/GNLY/ICAM1/IFNG/IL12A/KIR3DL1/LAG3/LGALS9/NCF1/SH2D1A/STX7                                    | Biological<br>Process |
| GO:0070098 | chemokine-mediated signaling pathway               | 16/875 | 3.07E-06 | 0.000691 | CCL3/CCR2/CCR3/CCR5/CCR7/CMKLR1/CX3CR1/CXCL10/CXCL2/CXCL5/CXCR1/CXCR2/CXCR4/PF4/PPBP/ROBO1                                                           | Biological<br>Process |
| GO:0032609 | interferon-gamma production                        | 18/875 | 4.48E-06 | 0.000907 | AZI2/CCR2/CCR7/EOMES/HLA-DPB1/HLA-DRB5/IL12A/IL18R1/ISG15/ITK/LGALS9/PDE4B/PGLYRP1/RIPK2/TICAM2/TLR8/TNF/TNFSF4                                      | Biological<br>Process |
| GO:0015671 | oxygen transport                                   | 7/875  | 5.02E-06 | 0.000967 | HBA1/HBA2/HBB/HBD/HBG1/HBG2/IPCEF1                                                                                                                   | Biological<br>Process |
| GO:0031643 | positive regulation of myelination                 | 6/875  | 7.93E-06 | 0.001361 | DICER1/HGF/NRG1/PARD3/TENM4/WASF3                                                                                                                    | Biological<br>Process |
| GO:0002292 | T cell differentiation involved in immune response | 12/875 | 8.41E-06 | 0.001361 | CLEC4D/EOMES/IFNG/IL18R1/IL6/LEF1/LGALS9/MYB/PTGER4/RELB/RIPK2/TNFSF4                                                                                | Biological<br>Process |
| GO:0031646 | positive regulation of neurological system process | 7/875  | 1.38E-05 | 0.001864 | DICER1/HGF/IL6/NRG1/PARD3/TENM4/WASF3                                                                                                                | Biological<br>Process |
| GO:0007431 | salivary gland development                         | 10/875 | 3.25E-05 | 0.003549 | EDAR/HGF/IL6/LAMA5/NFIB/NRP1/NTN4/TFCP2L1/TGM2/TNF                                                                                                   | Biological<br>Process |
| GO:0015701 | bicarbonate transport                              | 10/875 | 3.25E-05 | 0.003549 | CA1/CA14/HBA1/HBA2/HBB/SLC26A2/SLC26A6/SLC4A1/SLC4A10/SLC4A3                                                                                         | Biological<br>Process |
| GO:0001525 | angiogenesis                                       | 42/875 | 3.42E-05 | 0.003645 | APOLD1/ARHGAP24/BTG1/CALCRL/CCR2/CCR3/CD34/CEACAM1/CHI3L1/COL4A3/CX3CR1/CXCL10/CYP1B1/DICER1/EGF/EPGN/EPHA2/EPHB1/FASLG/FGF2/FGF9/HGF/HOXA5/HOXB3/IL | Biological<br>Process |

|            |                                                      |        |          |          |                                                                                                                                                                                                                                                                                           |                    |
|------------|------------------------------------------------------|--------|----------|----------|-------------------------------------------------------------------------------------------------------------------------------------------------------------------------------------------------------------------------------------------------------------------------------------------|--------------------|
|            |                                                      |        |          |          | 6/ITGAV/LAMA5/LEF1/MAPK14/NRARP/NRCAM/NRP1/PF4/PTGIS/RBPJ/ROBO1/ROCK1/ROCK2/SERPINF1/SPARC/TMIGD2/TNFAIP3                                                                                                                                                                                 |                    |
| GO:0032680 | regulation of tumor necrosis factor production       | 16/875 | 3.56E-05 | 0.003691 | AZU1/BPI/CCL3/CCR2/CD34/ERRFI1/IFNG/IRAK3/LGALS9/LTF/ORM1/PF4/RIPK2/TBC1D23/TLR1/TNFAIP3                                                                                                                                                                                                  | Biological Process |
| GO:0003158 | endothelium development                              | 17/875 | 3.93E-05 | 0.003974 | ACVR2B/APOLD1/BMP6/BTG1/CD34/CXCL10/ICAM1/LAMA5/NRG1/NRP1/PTPRS/RBPJ/RDX/ROCK1/ROCK2/STK3/TNF                                                                                                                                                                                             | Biological Process |
| GO:0007159 | leukocyte cell-cell adhesion                         | 46/875 | 4.55E-05 | 0.004278 | AZI2/CCR2/CCR7/CD83/CD8B/CLEC4D/EOMES/FLT3/HLA-DMA/HLA-DPB1/HLA-DQA2/HLA-DQB1/HLA-DRB5/ICAM1/ICOSLG/IFNG/IL12A/IL18R1/IL6/ITK/LAG3/LEF1/LGALS9/MAFB/MAIP3K8/MYB/NCK2/NRARP/PATZ1/PDE5A/PODXL2/PTGER4/RELB/RIPK2/ROCK1/SATB1/SIRPG/SIT1/SPTA1/TMIGD2/TNF/TNFRSF21/TNFSF4/TNFSF8/VNN1/ZC3H8 | Biological Process |
| GO:0042063 | gliogenesis                                          | 26/875 | 5.68E-05 | 0.004788 | ARHGEF10/AZU1/CCL3/CDK5R1/CXCR4/DICER1/EGR2/HMBS/LEF1/NFIB/NFIX/NRG1/P2RY12/PARD3/PHGDH/PICK1/PRKCI/S100B/SERPINE2/SH3TC2/SOX5/SRGAP2/TENM4/TNFRSF21/TSPAN2/WASF3                                                                                                                         | Biological Process |
| GO:0044110 | growth involved in symbiotic interaction             | 7/875  | 9.60E-05 | 0.006582 | CAMP/CTSG/ELANE/IFNG/MPO/PGLYRP1/TNF                                                                                                                                                                                                                                                      | Biological Process |
| GO:0044116 | growth of symbiont involved in interaction with host | 7/875  | 9.60E-05 | 0.006582 | CAMP/CTSG/ELANE/IFNG/MPO/PGLYRP1/TNF                                                                                                                                                                                                                                                      | Biological Process |
| GO:1902105 | regulation of leukocyte differentiation              | 27/875 | 0.000118 | 0.007678 | CCL3/CD83/FAM213A/FLT3/FLT3LG/GPR68/HLA-DMA/IFNG/IL12A/IL6/LEF1/LGALS9/LTF/MAFB/MYB/NME1/NRARP/OGT/PF4/PGLYRP1/PPARGC1B/PRDM1/RIPK2/TNF/TNFSF4/VNN1/ZC3H8                                                                                                                                 | Biological Process |
| GO:19037   | positive regulation of                               | 21/875 | 0.00012  | 0.007678 | CD83/FLT3LG/GPR68/HLA-DMA/HOXA5/IFNG/IL12A/IL6/ISG15/LEF1/LGALS9/MAPK14/MYB/                                                                                                                                                                                                              | Biological         |

|                |                                                                             |        |          |          |                                                                                                                                                                                                                                             |                    |
|----------------|-----------------------------------------------------------------------------|--------|----------|----------|---------------------------------------------------------------------------------------------------------------------------------------------------------------------------------------------------------------------------------------------|--------------------|
| 08             | hemopoiesis                                                                 |        |          |          | OGT/PF4/PPARGC1B/PRDM1/RIPK2/TNF/TNFSF4/VNN1                                                                                                                                                                                                | Process            |
| GO:00512<br>22 | positive regulation of protein transport                                    | 41/875 | 0.00013  | 0.008234 | AIM2/AKAP6/ALOX15B/ASPH/BMP6/C2CD5/CAMP/CASP5/CCL3/CD34/CD38/CD58/CDK5R1/CLC5A/DAB2/DACT1/EDAR/EGF/GOLPH3L/GPR68/HLA-DRB5/IFNG/IL18R1/IL6/ITGAX/JUP/KANK1/LGALS9/MAPK14/NLGN2/NRG1/PLK3/PTGER4/RHOU/RPL28/SCAMP5/STOM/TNF/TNFSF4/TRIP6/UGCG | Biological Process |
| GO:00069<br>59 | humoral immune response                                                     | 24/875 | 0.000141 | 0.008615 | A2M/AZU1/C1QA/CAMP/CCR7/CD83/CFH/DEFA1/DEFA1B/DEFA3/DEFA4/FCER2/HLA-DQB1/HLA-DRB5/IFNG/IL6/LTF/PROS1/RBPJ/SH2D1A/SLPI/SPNS2/TNF/TNFRSF21                                                                                                    | Biological Process |
| GO:00441<br>46 | negative regulation of growth of symbiont involved in interaction with host | 6/875  | 0.000161 | 0.009462 | CAMP/CTSG/ELANE/IFNG/MPO/TNF                                                                                                                                                                                                                | Biological Process |
| GO:00433<br>72 | positive regulation of CD4-positive; alpha-beta T cell differentiation      | 7/875  | 0.000177 | 0.009975 | CD83/IFNG/IL6/LGALS9/MYB/RIPK2/TNFSF4                                                                                                                                                                                                       | Biological Process |
| GO:00457<br>85 | positive regulation of cell adhesion                                        | 36/875 | 0.000198 | 0.010844 | AZU1/CCR2/CCR7/CD83/FBLN2/HLA-DMA/HLA-DPB1/HLA-DQA2/HLA-DQB1/HLA-DRB5/ICL6/IFNG/IL12A/IL6/ITGAV/LEF1/LGALS9/LIMS1/MAP3K8/MYB/MYO10/NCK2/NET1/NINJ1/NRG1/OLFM4/RIPK2/ROCK1/SIRPG/SPTA1/TGM2/TMIGD2/TNF/TNFSF4/TPM1/VNN1                      | Biological Process |
| GO:00450<br>73 | regulation of chemokine biosynthetic process                                | 5/875  | 0.000238 | 0.012177 | AZU1/ELANE/IFNG/IL6/TNF                                                                                                                                                                                                                     | Biological Process |
| GO:00454<br>46 | endothelial cell differentiation                                            | 14/875 | 0.000257 | 0.012896 | ACVR2B/APOLD1/BMP6/BTG1/ICAM1/LAMA5/NRG1/NRP1/PTPRS/RBPJ/RDX/ROCK1/ROCK2/TNF                                                                                                                                                                | Biological Process |

|                |                                                              |        |          |          |                                                                                                                                                                                                                                                   |                       |
|----------------|--------------------------------------------------------------|--------|----------|----------|---------------------------------------------------------------------------------------------------------------------------------------------------------------------------------------------------------------------------------------------------|-----------------------|
| GO:00425<br>52 | myelination                                                  | 15/875 | 0.000265 | 0.013088 | ARHGEF10/CXCR4/DICER1/EGR2/HGF/IFNG/MAL/NRG1/PARD3/PMP22/SH3TC2/TENM4/TNFRSF21/TSPAN2/WASF3                                                                                                                                                       | Biological<br>Process |
| GO:00512<br>49 | regulation of<br>lymphocyte activation                       | 36/875 | 0.000273 | 0.013263 | CCR2/CCR7/CD38/CD83/FLT3/FLT3LG/HLA-DMA/HLA-DPB1/HLA-DQA2/HLA-DQB1/HLA-DRB5/ICOSLG/IFNG/IL12A/IL6/LAG3/LGALS9/MAP3K8/MERTK/MYB/NCK2/NRARP/PDE5A/PGLYRP1/PRDM1/RIPK2/SIRPG/SIT1/SPTA1/THOC1/TMIGD2/TNFAIP3/TNFRSF21/TNFSF4/VNN1/ZC3H8              | Biological<br>Process |
| GO:19034<br>09 | reactive oxygen<br>species biosynthetic<br>process           | 13/875 | 0.000309 | 0.014541 | CD34/CLCN3/CYP1B1/ESR1/HBB/ICAM1/IFNG/IL6/MPO/NCF1/PTGIS/TLR5/TNF                                                                                                                                                                                 | Biological<br>Process |
| GO:00972<br>85 | cell-type specific<br>apoptotic process                      | 40/875 | 0.000334 | 0.015478 | AGRN/APAF1/BAG3/BCL2L11/BTG1/CCL3/CCR7/CD248/CDK5R1/CLEC5A/COL4A3/DICER1/FAM134B/FASLG/GCLM/GIMAP8/ICAM1/IFNG/IL12A/IL6/ITGA1/LEF1/LGALS9/LGMN/MERTK/NAIP/NEFL/NLRC4/NRBP2/NRG1/NRP1/PRKCI/ROCK1/RYR2/STK3/TNF/TNFAIP3/TNFRSF21/TSN2/SC22D3/ZC3H8 | Biological<br>Process |
| GO:00713<br>96 | cellular response to<br>lipid                                | 37/875 | 0.000337 | 0.015478 | BMP6/CCL3/CCR5/CD180/CX3CR1/CXCL10/ERRFI1/ESR1/FBXO32/FECH/HMBS/ICAM1/IFNG/IL12A/IL6/KANK2/KLF9/LCN2/LEF1/LTF/MAPK14/MAPK3/NME1/OGT/PDE4B/PID1/PRDM1/RIPK2/ROCK2/SERPINF1/SREBF1/THRB/TICAM2/TLR5/TNF/TNFAIP3/TNFSF4                              | Biological<br>Process |
| GO:19001<br>82 | positive regulation of<br>protein localization to<br>nucleus | 15/875 | 0.000367 | 0.01574  | AKAP6/BMP6/CDK5RAP3/DAB2/DACT1/EDAR/EGF/IL18R1/IL6/JUP/KANK1/LGALS9/MAPK14/TNF/TRIP6                                                                                                                                                              | Biological<br>Process |
| GO:00420<br>33 | chemokine<br>biosynthetic process                            | 5/875  | 0.00037  | 0.01574  | AZU1/ELANE/IFNG/IL6/TNF                                                                                                                                                                                                                           | Biological<br>Process |
| GO:00107<br>99 | regulation of<br>peptidyl-threonine                          | 8/875  | 0.000391 | 0.01623  | AZU1/CHI3L1/DDIT4/EGF/PARD3/RIPK2/SPRY2/STOX1                                                                                                                                                                                                     | Biological<br>Process |

|                |                                                     |        |          |          |                                                                                                                                    |                       |
|----------------|-----------------------------------------------------|--------|----------|----------|------------------------------------------------------------------------------------------------------------------------------------|-----------------------|
|                | phosphorylation                                     |        |          |          |                                                                                                                                    |                       |
| GO:00509<br>21 | positive regulation of chemotaxis                   | 16/875 | 0.000397 | 0.01623  | AZU1/CCL3/CCR2/CCR7/CMKLR1/CXCL10/CXCL2/CXCL5/FGF2/IL12A/IL6/LGALS9/NRP1/PD<br>GFB/PF4/PPBP                                        | Biological<br>Process |
| GO:00423<br>07 | positive regulation of protein import into nucleus  | 14/875 | 0.000408 | 0.016453 | AKAP6/BMP6/DAB2/DACT1/EDAR/EGF/IL18R1/IL6/JUP/KANK1/LGALS9/MAPK14/TNF/TRIP6                                                        | Biological<br>Process |
| GO:19030<br>35 | negative regulation of response to wounding         | 19/875 | 0.000428 | 0.016831 | CALCRL/CD34/CX3CR1/ELANE/FGF2/IER3/NLRP6/PDGFB/PGLYRP1/PLAUR/PRKG1/PROS1/P<br>TGER4/PTGIS/RPS19/SERPINB2/SERPINE2/SERPINF1/TNFAIP3 | Biological<br>Process |
| GO:19016<br>54 | response to ketone                                  | 19/875 | 0.000505 | 0.019042 | AVPR1A/CCR7/CD38/ERRFI1/FBXO32/FECH/HMBS/IL6/KLF2/KLF9/NEFL/NME1/ROCK2/SERP<br>INF1/SOCS1/SREBF1/TNFSF4/TXNIP/TYMS                 | Biological<br>Process |
| GO:00507<br>55 | chemokine metabolic process                         | 5/875  | 0.00055  | 0.019866 | AZU1/ELANE/IFNG/IL6/TNF                                                                                                            | Biological<br>Process |
| GO:00459<br>32 | negative regulation of muscle contraction           | 6/875  | 0.00059  | 0.02057  | CALCRL/GUCY1A3/NCF1/PDE5A/PRKG1/TNNT1                                                                                              | Biological<br>Process |
| GO:00550<br>23 | positive regulation of cardiac muscle tissue growth | 6/875  | 0.00059  | 0.02057  | AKAP6/FGF2/FGF9/MAPK14/NRG1/RBPJ                                                                                                   | Biological<br>Process |
| GO:19011<br>84 | regulation of ERBB signaling pathway                | 12/875 | 0.000771 | 0.025786 | AFAP1L2/EGF/EPGN/ERRFI1/FASLG/ITGA1/LGMN/NCK2/PLAUR/RBPJ/SH3TC2/SPRY2                                                              | Biological<br>Process |
| GO:00083<br>60 | regulation of cell shape                            | 17/875 | 0.000915 | 0.029391 | ARHGAP18/CCL3/CDC42EP1/CDC42EP3/COCH/EPB42/EPS8/FGD4/ICAM1/IL6/MYO10/PALM/R<br>DX/RHOU/S100B/SPTA1/WASF3                           | Biological<br>Process |
| GO:00454<br>28 | regulation of nitric oxide biosynthetic             | 9/875  | 0.000949 | 0.029544 | CD34/ESR1/HBB/ICAM1/IFNG/IL6/PTGIS/TLR5/TNF                                                                                        | Biological<br>Process |

|                |                                                      |        |          |          |                                                                                                                                                                                                                |                    |
|----------------|------------------------------------------------------|--------|----------|----------|----------------------------------------------------------------------------------------------------------------------------------------------------------------------------------------------------------------|--------------------|
|                | process                                              |        |          |          |                                                                                                                                                                                                                |                    |
| GO:00514<br>53 | regulation of intracellular pH                       | 10/875 | 0.000968 | 0.029544 | ATP6V0E2/AVPR1A/CLCN3/FASLG/SLC26A2/SLC26A6/SLC4A1/SLC4A10/SLC4A3/TMEM165                                                                                                                                      | Biological Process |
| GO:00609<br>96 | dendritic spine development                          | 10/875 | 0.000968 | 0.029544 | ACSL4/CAPRIN2/CDK5R1/CUX2/EPHB1/NCK2/PALM/PLK2/SHANK1/SRGAP2                                                                                                                                                   | Biological Process |
| GO:00026<br>90 | positive regulation of leukocyte chemotaxis          | 12/875 | 0.000971 | 0.029544 | CCL3/CCR2/CCR7/CMKLR1/CXCL10/CXCL2/CXCL5/IL12A/IL6/LGALS9/PF4/PPBP                                                                                                                                             | Biological Process |
| GO:00026<br>83 | negative regulation of immune system process         | 34/875 | 0.000999 | 0.029952 | A2M/BPI/CCL3/CCR2/FLT3/GCSAM/GPR68/HIST1H4A/HLA-DRB5/HOXA5/IRAK3/LAG3/LGALS9/LTF/MAFB/MERTK/NLRP6/NME1/NRARP/OLFM4/PDE5A/PF4/PGLYRP1/PRDM1/PTGER4/RPS19/THOC1/TICAM2/TNF/TNFAIP3/TNFRSF21/TNFSF4/TSC22D3/ZC3H8 | Biological Process |
| GO:00068<br>09 | nitric oxide biosynthetic process                    | 10/875 | 0.001107 | 0.032028 | CD34/CYP1B1/ESR1/HBB/ICAM1/IFNG/IL6/PTGIS/TLR5/TNF                                                                                                                                                             | Biological Process |
| GO:00971<br>91 | extrinsic apoptotic signaling pathway                | 24/875 | 0.001108 | 0.032028 | BAG3/BCL2L11/CTTN/CX3CR1/FASLG/GCLM/ICAM1/IFI6/IFNG/IL12A/ITGAV/ITM2C/LCN2/MAL/MOAP1/NRG1/NRP1/PF4/SH3RF1/STK3/TICAM2/TNF/TNFAIP3/TNFSF10                                                                      | Biological Process |
| GO:00072<br>49 | I-kappaB kinase/NF-kappaB signaling                  | 26/875 | 0.001251 | 0.033703 | AZI2/BIRC3/CCR7/EDAR/EEF1D/ESR1/FASLG/IL18R1/LGALS9/LTF/NLRP6/OLFM4/PER1/PLK2/RELB/RIPK2/ROCK1/ROCK2/S100B/TIAF1/TICAM2/TLR8/TNF/TNFAIP3/TNFSF10/TRIP6                                                         | Biological Process |
| GO:00715<br>49 | cellular response to dexamethasone stimulus          | 6/875  | 0.001277 | 0.033703 | ERRFI1/FBXO32/FECH/HMBS/IL6/SERPINF1                                                                                                                                                                           | Biological Process |
| GO:00321<br>02 | negative regulation of response to external stimulus | 25/875 | 0.001367 | 0.035009 | CALCRL/CD34/CX3CR1/ELANE/FGF2/IER3/KANK2/LTF/NLRP6/NRBP2/NRP1/PDGFB/PGLYRP1/PLAUR/PRDM1/PRKG1/PROS1/PTGER4/PTGIS/ROBO1/RPS19/SERPIN2/SERPINE2/SERPINF1/TNFAIP3                                                 | Biological Process |

|                |                                                                                                       |        |          |          |                                                                                                                                                                                                                            |                       |
|----------------|-------------------------------------------------------------------------------------------------------|--------|----------|----------|----------------------------------------------------------------------------------------------------------------------------------------------------------------------------------------------------------------------------|-----------------------|
| GO:00314<br>97 | chromatin assembly                                                                                    | 18/875 | 0.001424 | 0.036235 | ASF1B/CENPQ/CENPT/CENPV/H1FX/H3F3A/HIST1H1A/HIST1H2BL/HIST1H2BN/HIST1H2BO/<br>HIST1H3A/HIST1H3B/HIST1H3C/HIST1H4A/HIST2H3A/HIST2H3C/HMGA1/MCM2                                                                             | Biological<br>Process |
| GO:19016<br>55 | cellular response to<br>ketone                                                                        | 10/875 | 0.001627 | 0.038931 | ERRFI1/FBXO32/FECH/HMBS/IL6/KLF2/KLF9/ROCK2/SERPINF1/TNFSF4                                                                                                                                                                | Biological<br>Process |
| GO:00507<br>27 | regulation of<br>inflammatory response                                                                | 26/875 | 0.001646 | 0.038931 | A2M/BIRC3/CALCRL/CASP5/CCL3/CCR2/CCR7/CFH/CX3CR1/ELANE/IER3/IL6/MAPK14/NLRP<br>6/PER1/PGLYRP1/PROS1/PTGER4/PTGIS/RPS19/SERPINF1/TBC1D23/TLR10/TNF/TNFAIP3/TNF<br>SF4                                                       | Biological<br>Process |
| GO:00329<br>70 | regulation of actin<br>filament-based process                                                         | 30/875 | 0.001833 | 0.042133 | ADD2/ARFIP1/ARHGAP18/ARHGEF10/CCR7/CDC42EP1/CDC42EP3/CDK5R1/CFL2/CTTN/DIXD<br>C1/EPS8/ICAM1/JUP/KANK1/LIMA1/NCK2/PARD3/PDE4B/PICK1/PTGER4/RDX/ROCK1/ROCK2<br>/RYR2/SHANK1/SPTA1/SPTBN5/SYNPO/TPM1                          | Biological<br>Process |
| GO:00001<br>83 | chromatin silencing at<br>rDNA                                                                        | 8/875  | 0.00193  | 0.043638 | H3F3A/HIST1H3A/HIST1H3B/HIST1H3C/HIST1H4A/HIST2H3A/HIST2H3C/TAF1A                                                                                                                                                          | Biological<br>Process |
| GO:00468<br>24 | positive regulation of<br>nucleocytoplasmic<br>transport                                              | 14/875 | 0.001972 | 0.044081 | AKAP6/BMP6/DAB2/DACT1/EDAR/EGF/IL18R1/IL6/JUP/KANK1/LGALS9/MAPK14/TNF/TRIP6                                                                                                                                                | Biological<br>Process |
| GO:00431<br>54 | negative regulation of<br>cysteine-type<br>endopeptidase activity<br>involved in apoptotic<br>process | 12/875 | 0.00204  | 0.0451   | BIRC3/FASLG/HERPUD1/HGF/IFI6/IL6/LEF1/NAIP/NLRC4/PLAUR/SH3RF1/TNFSF10                                                                                                                                                      | Biological<br>Process |
| GO:00080<br>15 | blood circulation                                                                                     | 37/875 | 0.002061 | 0.045127 | ACSM3/ACTA2/ADRB1/AKAP9/ASPH/AVPR1A/AZU1/CD34/CD38/COL4A3/CTSG/CXCL10/EPH<br>X2/FGFBP3/GCLM/GUCY1A3/HBB/ICAM1/IER3/IFNG/ITGA1/JUP/MME/NTSR1/OLR1/OPRL1/P<br>DE3A/PDE4B/PDE5A/PDGFB/PRKG1/RYR2/SMAD5/SREBF1/THRB/TPM1/TRPM4 | Biological<br>Process |

|                |                                                         |        |          |          |                                                                                                                                                                              |                       |
|----------------|---------------------------------------------------------|--------|----------|----------|------------------------------------------------------------------------------------------------------------------------------------------------------------------------------|-----------------------|
| GO:00485<br>20 | positive regulation of<br>behavior                      | 16/875 | 0.002073 | 0.045127 | AZU1/CCL3/CCR2/CCR7/CMKLR1/CXCL10/CXCL2/CXCL5/FGF2/IL12A/IL6/LGALS9/NRP1/PD<br>GFB/PF4/PPBP                                                                                  | Biological<br>Process |
| GO:00327<br>76 | DNA methylation on<br>cytosine                          | 7/875  | 0.002074 | 0.045127 | H3F3A/HIST1H3A/HIST1H3B/HIST1H3C/HIST1H4A/HIST2H3A/HIST2H3C                                                                                                                  | Biological<br>Process |
| GO:00450<br>17 | glycerolipid<br>biosynthetic process                    | 24/875 | 0.002213 | 0.047475 | ABHD5/ACSL4/AGPAT4/ELOVL7/ETNK1/ETNK2/FAR1/FGF2/LPL/OCRL/PDGFB/PHOSPHO1/PI<br>GF/PLA2G12A/PLA2G4A/PLA2G4B/PLA2G4C/PLAUR/PLD1/PLD4/SACM1L/SIK1/SREBF1/SYNJ<br>1               | Biological<br>Process |
| GO:00217<br>95 | cerebral cortex cell<br>migration                       | 8/875  | 0.002241 | 0.047475 | CCDC141/CDK5R1/CX3CR1/DIXDC1/MDGA1/NRP1/ROBO1/SRGAP2                                                                                                                         | Biological<br>Process |
| GO:00305<br>20 | intracellular estrogen<br>receptor signaling<br>pathway | 8/875  | 0.002241 | 0.047475 | DEFA1/DEFA1B/DEFA3/ESR1/KANK2/PHB2/PPARGC1B/ZNF366                                                                                                                           | Biological<br>Process |
| GO:00329<br>56 | regulation of actin<br>cytoskeleton<br>organization     | 26/875 | 0.002258 | 0.047592 | ADD2/ARFIP1/ARHGAP18/ARHGEF10/CCR7/CDC42EP1/CDC42EP3/CDK5R1/CFL2/CTTN/DIXD<br>C1/EPS8/ICAM1/KANK1/LIMA1/NCK2/PICK1/PTGER4/RDX/ROCK1/ROCK2/SHANK1/SPTA1/S<br>PTBN5/SYNPO/TPM1 | Biological<br>Process |
| GO:00513<br>84 | response to<br>glucocorticoid                           | 17/875 | 0.002305 | 0.048084 | ALPL/AVPR1A/BMP6/ERRF1/FBXO32/FECH/HMBS/IL6/KLF9/NEFL/PPARGC1B/PTGDS/S100B<br>/SERPINF1/SPARC/TNF/TYMS                                                                       | Biological<br>Process |
| GO:00068<br>85 | regulation of pH                                        | 11/875 | 0.002329 | 0.048323 | ATP6V0E2/AVPR1A/CLCN3/FASLG/SLC26A2/SLC26A6/SLC4A1/SLC4A10/SLC4A3/SLC9A4/TM<br>EM165                                                                                         | Biological<br>Process |
| GO:00456<br>01 | regulation of<br>endothelial cell<br>differentiation    | 6/875  | 0.002452 | 0.050261 | APOLD1/BMP6/BTG1/ROCK1/ROCK2/TNF                                                                                                                                             | Biological<br>Process |
| GO:00313       | regulation of cell                                      | 9/875  | 0.002514 | 0.050867 | BCL2L11/FCER2/ICAM1/IFNG/IL12A/LAG3/LGALS9/SH2D1A/STX7                                                                                                                       | Biological            |

|            |                                                      |        |          |          |                                                                                                                                                                                                   |                    |
|------------|------------------------------------------------------|--------|----------|----------|---------------------------------------------------------------------------------------------------------------------------------------------------------------------------------------------------|--------------------|
| 41         | killing                                              |        |          |          |                                                                                                                                                                                                   | Process            |
| GO:000176  | leukocyte homeostasis                                | 11/875 | 0.002585 | 0.05153  | BCL2L11/FLT3/IFNG/IL6/LGALS9/PDE4B/SPNS2/SPTA1/TNFAIP3/TSC22D3/ZC3H8                                                                                                                              | Biological Process |
| GO:0007585 | respiratory gaseous exchange                         | 10/875 | 0.002611 | 0.05153  | BPGM/CSF2RB/GLS/HOXA5/MAFB/NLGN2/NTSR1/SLC5A3/TRAF4/TSHZ3                                                                                                                                         | Biological Process |
| GO:0030278 | regulation of ossification                           | 19/875 | 0.002666 | 0.052361 | ACVR2B/BMP6/CCL3/DHRS3/EGR2/HGF/ID3/IFITM1/IL6/JUND/KL/LTF/PBX1/PHOSPHO1/PTGER4/RBPJ/SMAD5/TNF/TOB1                                                                                               | Biological Process |
| GO:0043244 | regulation of protein complex disassembly            | 12/875 | 0.002726 | 0.052758 | ADD2/ASPH/CFL2/EPS8/IRAK3/LIMA1/RDX/SBDS/SPTA1/SPTBN5/SYNJ1/TNF                                                                                                                                   | Biological Process |
| GO:0045161 | neuronal ion channel clustering                      | 4/875  | 0.002738 | 0.052758 | AGRN/CNTNAP2/NRCAM/PICK1                                                                                                                                                                          | Biological Process |
| GO:0090150 | establishment of protein localization to membrane    | 33/875 | 0.002837 | 0.053776 | BCL2L11/C2CD5/CACNB1/CDK5R1/DYNLL1/EPHA2/JUP/LAMA5/MOAP1/NCF1/PACSIN1/PALM/PARD3/PID1/PRKCI/RDX/ROCK1/ROCK2/RPL18/RPL18A/RPL28/RPL8/RPS15/RPS18/RPS19/RPS26/RPS4X/RPS5/SRP54/STOM/TNF/WRB/ZDHHC18 | Biological Process |
| GO:0051702 | interaction with symbiont                            | 8/875  | 0.002979 | 0.054119 | CAMP/CCL3/CTSG/ELANE/LEF1/LTF/NCF1/STOM                                                                                                                                                           | Biological Process |
| GO:0032103 | positive regulation of response to external stimulus | 25/875 | 0.003061 | 0.055289 | AZU1/BMP6/CCL3/CCR2/CCR7/CD180/CMKLR1/CXCL10/CXCL2/CXCL5/FGF2/IL12A/IL6/LGALS9/NRP1/PDGFB/PF4/PPBP/PTGER4/RPS19/SCARF1/TLR10/TNF/TNFSF4/WDFY3                                                     | Biological Process |
| GO:2001057 | reactive nitrogen species metabolic process          | 11/875 | 0.003164 | 0.056718 | CD34/CYP1B1/ESR1/HBB/ICAM1/IFNG/IL6/MARC1/PTGIS/TLR5/TNF                                                                                                                                          | Biological Process |
| GO:00026   | regulation of immune                                 | 35/875 | 0.003275 | 0.057715 | A2M/AIM2/BIRC3/CCR2/CD8B/CFH/ELMOD2/FAM131B/FANCL/FCER2/FCGR3B/HIST1H3A/HI                                                                                                                        | Biological         |

|                |                                                           |        |          |          |                                                                                                                                                                                          |                       |
|----------------|-----------------------------------------------------------|--------|----------|----------|------------------------------------------------------------------------------------------------------------------------------------------------------------------------------------------|-----------------------|
| 97             | effector process                                          |        |          |          | ST1H3B/HIST1H3C/ICAM1/IFNG/IL12A/IL6/IRAK3/LAG3/LGALS9/MYB/MYLK/PGLYRP1/PRO<br>S1/RIPK2/RPS19/SH2D1A/STOM/STX7/THOC1/TNF/TNFAIP3/TNFSF4/TRPM4                                            | Process               |
| GO:00096<br>36 | response to toxic<br>substance                            | 19/875 | 0.003424 | 0.05946  | ALPL/AQP10/CCL3/CYP1B1/EPHX2/FECH/GUCY1A3/HMBS/IL6/LCN2/MAPK3/MARC1/MGMT/<br>MPO/NEFL/PLA2G4A/TRPM6/TYMS/ZC3H8                                                                           | Biological<br>Process |
| GO:00217<br>00 | developmental<br>maturation                               | 23/875 | 0.003546 | 0.061058 | AGRN/BFSP1/BLOC1S5/CDK5R1/CLCN3/CNTNAP2/EPB42/HOXA5/KLF2/LTF/NRCAM/NTN4/P<br>ALM/PDE3A/PHOSPHO1/PICK1/RBPJ/SCARF1/SEPT4/SHANK1/SLC26A6/TFCP2L1/TYMS                                      | Biological<br>Process |
| GO:00108<br>93 | positive regulation of<br>steroid biosynthetic<br>process | 4/875  | 0.003791 | 0.063122 | BMP6/IFNG/SREBF1/TNF                                                                                                                                                                     | Biological<br>Process |
| GO:00485<br>05 | regulation of timing of<br>cell differentiation           | 4/875  | 0.003791 | 0.063122 | FGF9/RBPJ/SERPINE2/SOX5                                                                                                                                                                  | Biological<br>Process |
| GO:00600<br>33 | anatomical structure<br>regression                        | 4/875  | 0.003791 | 0.063122 | CD248/LEF1/NINJ1/SMAD5                                                                                                                                                                   | Biological<br>Process |
| GO:00352<br>65 | organ growth                                              | 15/875 | 0.003924 | 0.064213 | ACVR2B/AKAP6/BCL2L11/CACNA2D2/DUSP6/ESR1/FGF2/FGF9/LY6E/MAPK14/NRG1/RBPJ/SP<br>RY2/STK3/TENM4                                                                                            | Biological<br>Process |
| GO:00970<br>61 | dendritic spine<br>organization                           | 7/875  | 0.003949 | 0.064213 | CAPRIN2/CDK5R1/CTTN/CUX2/EPHB1/PICK1/SHANK1                                                                                                                                              | Biological<br>Process |
| GO:00092<br>14 | cyclic nucleotide<br>catabolic process                    | 5/875  | 0.004104 | 0.065126 | PDE3A/PDE4B/PDE5A/PDE7B/PDE9A                                                                                                                                                            | Biological<br>Process |
| GO:00070<br>15 | actin filament<br>organization                            | 28/875 | 0.004132 | 0.065309 | ADD2/ARFIP1/ARHGAP18/ARHGEF10/CCR7/CDC42EP1/CDC42EP3/CFL2/CTTN/EPS8/ICAM1/K<br>ANK1/LIMA1/MYLK/NCK2/PICK1/PPARGC1B/PRKCI/PTGER4/RDX/ROCK1/ROCK2/SHANK1/<br>SPTA1/SPTBN5/SYNPO/TPM1/WASF3 | Biological<br>Process |
| GO:00604       | regulation of cell                                        | 14/875 | 0.004422 | 0.068063 | AGRN/ARHGAP24/ATP8B1/CCR7/CDC42EP1/CDC42EP3/EPHA2/FNBP1L/ICAM1/KANK1/MYO                                                                                                                 | Biological            |

|            |                                                     |        |          |          |                                                                                                                                                                                                              |                    |
|------------|-----------------------------------------------------|--------|----------|----------|--------------------------------------------------------------------------------------------------------------------------------------------------------------------------------------------------------------|--------------------|
| 91         | projection assembly                                 |        |          |          | 10/PALM/PLD1/RDX                                                                                                                                                                                             | Process            |
| GO:0019369 | arachidonic acid metabolic process                  | 9/875  | 0.00455  | 0.068627 | ALOX15B/CYP1B1/EPHX2/MAPK3/PLA2G4A/PLA2G4B/PLA2G4C/PTGDS/PTGIS                                                                                                                                               | Biological Process |
| GO:0070555 | response to interleukin-1                           | 13/875 | 0.004579 | 0.068627 | CCL3/CD38/CHI3L1/ICAM1/IL6/IRAK3/KLF2/LCN2/LGALS9/MAPK3/PRKCI/PTGIS/RIPK2                                                                                                                                    | Biological Process |
| GO:0031349 | positive regulation of defense response             | 35/875 | 0.004629 | 0.06912  | AIM2/BIRC3/CCL3/CCR2/CCR7/CLEC4C/CLEC4D/COCH/DUSP6/IL12A/IL6/IRAK3/LAG3/LGMN/LTF/MAP3K8/MAPK14/MAPK3/NLRC4/NLRP6/PGLYRP1/PSMC6/PTGER4/RELB/RIPK2/RPS19/SH2D1A/TICAM2/TLR1/TLR10/TLR5/TLR8/TNF/TNFAIP3/TNFSF4 | Biological Process |
| GO:0046434 | organophosphate catabolic process                   | 17/875 | 0.004828 | 0.071039 | DDIT4/IER3/LIPC/NAPEPLD/NTSR1/NUDT1/OGT/PDE3A/PDE4B/PDE5A/PDE7B/PDE9A/PLA2G4A/PLA2G4B/PLA2G4C/PLD1/SYNJ1                                                                                                     | Biological Process |
| GO:0001649 | osteoblast differentiation                          | 20/875 | 0.004994 | 0.072955 | ACVR2B/ALPL/BMP6/CCL3/CLEC5A/EPHA2/FBL/FGF9/HGF/ID3/IFITM1/IL6/JUND/LEF1/LTF/RPS15/SMAD5/TMEM119/TNF/TOB1                                                                                                    | Biological Process |
| GO:1902932 | positive regulation of alcohol biosynthetic process | 5/875  | 0.005084 | 0.072994 | BMP6/IFNG/NTSR1/SREBF1/TNF                                                                                                                                                                                   | Biological Process |
| GO:0040034 | regulation of development; heterochronic            | 4/875  | 0.005087 | 0.072994 | FGF9/RBPJ/SERPINE2/SOX5                                                                                                                                                                                      | Biological Process |
| GO:0065004 | protein-DNA complex assembly                        | 19/875 | 0.005799 | 0.081762 | ASF1B/CENPQ/CENPT/CENPV/H1FX/H3F3A/HIST1H1A/HIST1H2BL/HIST1H2BN/HIST1H2BO/HIST1H3A/HIST1H3B/HIST1H3C/HIST1H4A/HIST2H3A/HIST2H3C/MCM2/PSMC6/RAD52                                                             | Biological Process |
| GO:0002224 | toll-like receptor signaling pathway                | 16/875 | 0.005917 | 0.082564 | BIRC3/DUSP6/IRAK3/LGMN/LTF/MAP3K8/MAPK14/MAPK3/NLRP6/RIPK2/TICAM2/TLR1/TLR10/TLR5/TLR8/TNFAIP3                                                                                                               | Biological Process |
| GO:00330   | muscle cell                                         | 15/875 | 0.005959 | 0.082791 | CALCRL/ELANE/FGF2/FGF9/IFNG/IL12A/IL6/MAPK14/NRG1/PAXBP1/PDGFB/RBPJ/TENM4/T                                                                                                                                  | Biological         |

|                |                                                  |        |          |          |                                                                                                                                                                                             |                       |
|----------------|--------------------------------------------------|--------|----------|----------|---------------------------------------------------------------------------------------------------------------------------------------------------------------------------------------------|-----------------------|
| 02             | proliferation                                    |        |          |          | NF/TNFAIP3                                                                                                                                                                                  | Process               |
| GO:00435<br>76 | regulation of<br>respiratory gaseous<br>exchange | 5/875  | 0.006217 | 0.084704 | GLS/NLGN2/NTSR1/SLC5A3/TSHZ3                                                                                                                                                                | Biological<br>Process |
| GO:00973<br>06 | cellular response to<br>alcohol                  | 12/875 | 0.006472 | 0.085302 | ERRFI1/ESR1/FBXO32/FECH/HMBS/IL6/JUP/KANK2/KLF2/KLF9/ROCK2/SERPINF1                                                                                                                         | Biological<br>Process |
| GO:19015<br>68 | fatty acid derivative<br>metabolic process       | 12/875 | 0.006472 | 0.085302 | ALOX15B/AVPR1A/CYP1B1/CYP4F22/EPHX2/MAPK3/NCF1/PLA2G4A/PLA2G4B/PLA2G4C/PT<br>GDS/PTGIS                                                                                                      | Biological<br>Process |
| GO:00703<br>71 | ERK1 and ERK2<br>cascade                         | 22/875 | 0.006526 | 0.085665 | CCL3/CCR7/CHI3L1/DUSP6/EGF/EPHA2/EPHB1/ERRFI1/FGF2/ICAM1/IL6/ITGAV/LGALS9/MA<br>PK3/NLRP6/NRP1/PDGFB/PHB2/PTGER4/RIPK2/SPRY2/TNF                                                            | Biological<br>Process |
| GO:00347<br>28 | nucleosome<br>organization                       | 17/875 | 0.006558 | 0.085665 | ASF1B/CENPQ/CENPT/H1FX/H3F3A/HIST1H1A/HIST1H2BL/HIST1H2BN/HIST1H2BO/HIST1H3<br>A/HIST1H3B/HIST1H3C/HIST1H4A/HIST2H3A/HIST2H3C/HMGA1/MCM2                                                    | Biological<br>Process |
| GO:00022<br>27 | innate immune<br>response in mucosa              | 5/875  | 0.007517 | 0.092456 | CAMP/DEFA1/DEFA1B/DEFA3/LTF                                                                                                                                                                 | Biological<br>Process |
| GO:00343<br>68 | protein-lipid complex<br>remodeling              | 5/875  | 0.007517 | 0.092456 | ABCA5/APOM/LIPC/LPL/MPO                                                                                                                                                                     | Biological<br>Process |
| GO:00343<br>69 | plasma lipoprotein<br>particle remodeling        | 5/875  | 0.007517 | 0.092456 | ABCA5/APOM/LIPC/LPL/MPO                                                                                                                                                                     | Biological<br>Process |
| GO:00516<br>07 | defense response to<br>virus                     | 28/875 | 0.007788 | 0.09521  | AIM2/AZU1/BIRC3/CD8B/CXCL10/DDIT4/DEFA1/DEFA1B/DEFA3/DICER1/ELMOD2/FAM131B/<br>FANCL/FCGR3B/HIST1H3A/HIST1H3B/HIST1H3C/IFIT1B/IFIT2/IFITM1/IFITM2/IFNG/IL6/ISG15<br>/MYLK/STOM/TLR8/TNFAIP3 | Biological<br>Process |
| GO:00970<br>06 | regulation of plasma<br>lipoprotein particle     | 8/875  | 0.00796  | 0.096429 | ABCA5/APOM/FECH/LIPC/LMF1/LPL/MPO/MYLIP                                                                                                                                                     | Biological<br>Process |

|            |                                                    |        |          |          |                                                                                                                                    |                    |
|------------|----------------------------------------------------|--------|----------|----------|------------------------------------------------------------------------------------------------------------------------------------|--------------------|
|            | levels                                             |        |          |          |                                                                                                                                    |                    |
| GO:000606  | protein import into nucleus                        | 23/875 | 0.008162 | 0.097137 | AKAP6/BMP6/DAB2/DACT1/EDAR/EGF/FGF9/IFNG/IL18R1/IL6/JUP/KANK1/LGALS9/MAPK14/MAPK3/PHB2/PRICKLE1/RANBP17/SFRP5/TNF/TOB1/TRIP6/TXNIP | Biological Process |
| GO:1902593 | single-organism nuclear import                     | 23/875 | 0.008162 | 0.097137 | AKAP6/BMP6/DAB2/DACT1/EDAR/EGF/FGF9/IFNG/IL18R1/IL6/JUP/KANK1/LGALS9/MAPK14/MAPK3/PHB2/PRICKLE1/RANBP17/SFRP5/TNF/TOB1/TRIP6/TXNIP | Biological Process |
| GO:0000028 | ribosomal small subunit assembly                   | 4/875  | 0.008501 | 0.099701 | RPS15/RPS19/RPS5/RRP7A                                                                                                             | Biological Process |
| GO:0010888 | negative regulation of lipid storage               | 4/875  | 0.008501 | 0.099701 | ABHD5/IL6/ITGAV/TNF                                                                                                                | Biological Process |
| GO:0043393 | regulation of protein binding                      | 16/875 | 0.008554 | 0.099794 | ADD2/CAPRIN2/DAB2/HERPUD1/IFIT2/LEF1/MAPK3/NRG1/NRP1/PDGFB/PLK2/ROCK1/SLPI/PTA1/STK3/TRAF4                                         | Biological Process |
| GO:0045669 | positive regulation of osteoblast differentiation  | 8/875  | 0.008867 | 0.102031 | ACVR2B/BMP6/HGF/IFITM1/IL6/JUND/LTF/SMAD5                                                                                          | Biological Process |
| GO:0002544 | chronic inflammatory response                      | 5/875  | 0.008996 | 0.102031 | CAMP/CX3CR1/TNF/TNFAIP3/VNN1                                                                                                       | Biological Process |
| GO:0006779 | porphyrin-containing compound biosynthetic process | 5/875  | 0.008996 | 0.102031 | ALAS2/FECH/HMBS/SLC25A39/SPTA1                                                                                                     | Biological Process |
| GO:0030509 | BMP signaling pathway                              | 14/875 | 0.009503 | 0.106807 | ACVR2B/BMP6/FKBP8/FSTL1/LEF1/MAPK3/RBPJ/RGMB/RYR2/SKOR1/SMAD5/TOB1/ZCCHC12/ZFYVE16                                                 | Biological Process |
| GO:0046683 | response to organophosphorus                       | 14/875 | 0.009503 | 0.106807 | AKAP6/AKAP9/ASPH/EGR2/JUND/NME1/P2RY12/PDE3A/PER1/PPARGC1B/SLC26A6/SPARC/SREBF1/TYMS                                               | Biological Process |

|            |                                             |        |          |          |                                                                                                                                                               |                    |
|------------|---------------------------------------------|--------|----------|----------|---------------------------------------------------------------------------------------------------------------------------------------------------------------|--------------------|
| GO:0014074 | response to purine-containing compound      | 15/875 | 0.010526 | 0.113793 | AKAP6/AKAP9/ASPH/EGR2/IL6/JUND/NME1/P2RY12/PDE3A/PER1/PPARGC1B/RYR2/SLC26A6/SPARC/SREBF1                                                                      | Biological Process |
| GO:0050673 | epithelial cell proliferation               | 28/875 | 0.010638 | 0.113793 | BMP6/CCR3/CD34/CDKN2B/EPGN/EPHA2/ERRFI1/ESR1/FGF2/FGF9/HOXA5/IFNG/IL6/IRF6/KLF9/LIMS2/NFIB/NME1/NRARP/NRP1/PDGFB/PHB2/ROBO1/SERPINF1/SPARC/STOX1/TNF/TNF AIP3 | Biological Process |
| GO:0015697 | quaternary ammonium group transport         | 4/875  | 0.010658 | 0.113793 | CPT1B/PRKAB2/SLC22A16/SLC25A29                                                                                                                                | Biological Process |
| GO:0020027 | hemoglobin metabolic process                | 4/875  | 0.010658 | 0.113793 | AHSP/ALAS2/EPB42/FECH                                                                                                                                         | Biological Process |
| GO:0009395 | phospholipid catabolic process              | 6/875  | 0.010771 | 0.114096 | LIPC/NAPEPLD/PLA2G4A/PLA2G4B/PLA2G4C/PLD1                                                                                                                     | Biological Process |
| GO:0001909 | leukocyte mediated cytotoxicity             | 10/875 | 0.011088 | 0.116535 | CTSG/ELANE/ICAM1/IL12A/KIR3DL1/LAG3/LGALS9/NCF1/SH2D1A/STX7                                                                                                   | Biological Process |
| GO:0045445 | myoblast differentiation                    | 10/875 | 0.011088 | 0.116535 | BTG1/CXCL10/DICER1/FLT3LG/ID3/MAPK14/NRG1/PRICKLE1/RBPJ/TNF                                                                                                   | Biological Process |
| GO:0006323 | DNA packaging                               | 18/875 | 0.012126 | 0.12453  | ASF1B/CENPQ/CENPT/CENPV/H1FX/H3F3A/HIST1H1A/HIST1H2BL/HIST1H2BN/HIST1H2BO/HIST1H3A/HIST1H3B/HIST1H3C/HIST1H4A/HIST2H3A/HIST2H3C/HMGA1/MCM2                    | Biological Process |
| GO:0031348 | negative regulation of defense response     | 14/875 | 0.012207 | 0.125051 | A2M/CALCRL/CX3CR1/ELANE/IER3/IRAK3/LGALS9/NLRP6/PGLYRP1/PTGER4/PTGIS/RPS19/SERPINF1/TNFAIP3                                                                   | Biological Process |
| GO:0033598 | mammary gland epithelial cell proliferation | 5/875  | 0.012528 | 0.125219 | EPHA2/ESR1/HOXA5/PHB2/ROBO1                                                                                                                                   | Biological Process |

|                |                                                      |        |          |          |                                                                                                                                                                                                       |                       |
|----------------|------------------------------------------------------|--------|----------|----------|-------------------------------------------------------------------------------------------------------------------------------------------------------------------------------------------------------|-----------------------|
| GO:00024<br>37 | inflammatory response<br>to antigenic stimulus       | 7/875  | 0.012542 | 0.125219 | CCR7/ELANE/HLA-DRB5/ICAM1/NLRP6/RBPJ/TNF                                                                                                                                                              | Biological<br>Process |
| GO:00301<br>95 | negative regulation of<br>blood coagulation          | 7/875  | 0.012542 | 0.125219 | CD34/PDGFB/PLAUR/PRKG1/PROS1/SERPINB2/SERPINE2                                                                                                                                                        | Biological<br>Process |
| GO:19000<br>47 | negative regulation of<br>hemostasis                 | 7/875  | 0.012542 | 0.125219 | CD34/PDGFB/PLAUR/PRKG1/PROS1/SERPINB2/SERPINE2                                                                                                                                                        | Biological<br>Process |
| GO:00060<br>66 | alcohol metabolic<br>process                         | 31/875 | 0.012939 | 0.12566  | ACER3/BMP6/CYP1B1/DHRS3/EPHX2/ERLIN1/FECH/FGF2/GK5/IFNG/IPMK/LEPR/LGMN/LIPC<br>/LMF1/MINPP1/NTSR1/OCRL/PHOSPHO1/PLA2G12A/PLA2G4A/PLA2G4B/PLA2G4C/PLCH1/PL<br>D4/SCARF1/SLC5A3/SREBF1/SYNJ1/TNF/TNFSF4 | Biological<br>Process |
| GO:00516<br>42 | centrosome<br>localization                           | 4/875  | 0.01314  | 0.12566  | ASUN/CCDC141/DYNC1LI2/PARD3                                                                                                                                                                           | Biological<br>Process |
| GO:00197<br>30 | antimicrobial humoral<br>response                    | 8/875  | 0.013284 | 0.12566  | AZU1/CAMP/DEFA1/DEFA1B/DEFA3/DEFA4/LTF/SLPI                                                                                                                                                           | Biological<br>Process |
| GO:00017<br>71 | immunological<br>synapse formation                   | 3/875  | 0.013392 | 0.12566  | CCR7/EPHB1/NCK2                                                                                                                                                                                       | Biological<br>Process |
| GO:00026<br>79 | respiratory burst<br>involved in defense<br>response | 3/875  | 0.013392 | 0.12566  | MPO/NCF1/RPS19                                                                                                                                                                                        | Biological<br>Process |
| GO:00465<br>01 | protoporphyrinogen IX<br>metabolic process           | 3/875  | 0.013392 | 0.12566  | ALAS2/FECH/HMBS                                                                                                                                                                                       | Biological<br>Process |
| GO:00515<br>97 | response to<br>methylmercury                         | 3/875  | 0.013392 | 0.12566  | FECH/HMBS/S100B                                                                                                                                                                                       | Biological<br>Process |
| GO:19012       | regulation of neuron                                 | 21/875 | 0.013942 | 0.12744  | AGRN/BCL2L11/CCL3/CD34/CDK5R1/DDIT4/EPHB1/FAM134B/FASLG/GCLM/IL6/TTGA1/LGM                                                                                                                            | Biological            |

|                |                                          |        |          |          |                                                                                                                                                                                                       |                       |
|----------------|------------------------------------------|--------|----------|----------|-------------------------------------------------------------------------------------------------------------------------------------------------------------------------------------------------------|-----------------------|
| 14             | death                                    |        |          |          | N/NAIP/NEFL/NLRC4/NRBP2/NRP1/PRKCI/ROCK1/SERPINF1                                                                                                                                                     | Process               |
| GO:00029<br>20 | regulation of humoral<br>immune response | 7/875  | 0.013984 | 0.12744  | A2M/CCR7/CFH/FCER2/PROS1/SPNS2/TNF                                                                                                                                                                    | Biological<br>Process |
| GO:00001<br>86 | activation of MAPKK<br>activity          | 21/875 | 0.014564 | 0.131022 | AKAP9/CSF2RB/DUSP5/DUSP6/EGF/FGF2/FGF9/FRS3/IL3RA/KL/MAP3K6/MAP3K8/MAPK3/NEFL/NRG1/PDGFB/PSMC6/RASGEF1A/SPTA1/SPTBN5/STK3                                                                             | Biological<br>Process |
| GO:00096<br>12 | response to mechanical<br>stimulus       | 18/875 | 0.014774 | 0.131962 | BAG3/BMP6/CASP5/CHI3L1/CNTNAP2/CXCL10/IL6/JUND/JUP/LOXHD1/MAPK14/MAPK3/PTGER4/RYR2/SERPINE2/TLR5/TLR8/TXNIP                                                                                           | Biological<br>Process |
| GO:00706<br>63 | regulation of leukocyte<br>proliferation | 18/875 | 0.014774 | 0.131962 | CCR2/CD38/HLA-DPB1/HLA-DRB5/ICOSLG/IFNG/IL12A/IL6/LGALS9/NCK2/PDE5A/PRDM1/RIPK2/SPTA1/TMIGD2/TNFAIP3/TNFRSF21/TNFSF4                                                                                  | Biological<br>Process |
| GO:00725<br>11 | divalent inorganic<br>cation transport   | 33/875 | 0.015297 | 0.13604  | AKAP6/ASP/CACHD1/CACNA2D2/CACNB1/CALCRL/CCL3/CCR5/CCR7/CXCL10/EGF/EPPIN/FGF2/ICAM1/ITGAV/LOXHD1/MCOLN2/MYB/MYLK/NIPA1/NIPA2/NIPAL2/NTSR1/OPRL1/P2RY12/PDE4B/PDGFB/RYR2/SMDT1/TCN1/TMEM165/TRPM4/TRPM6 | Biological<br>Process |
| GO:00717<br>72 | response to BMP                          | 14/875 | 0.015476 | 0.136401 | ACVR2B/BMP6/FKBP8/FSTL1/LEF1/MAPK3/RBPJ/RGMB/RYR2/SKOR1/SMAD5/TOB1/ZCCHC12/ZFYVE16                                                                                                                    | Biological<br>Process |
| GO:00717<br>73 | cellular response to<br>BMP stimulus     | 14/875 | 0.015476 | 0.136401 | ACVR2B/BMP6/FKBP8/FSTL1/LEF1/MAPK3/RBPJ/RGMB/RYR2/SKOR1/SMAD5/TOB1/ZCCHC12/ZFYVE16                                                                                                                    | Biological<br>Process |
| GO:00706<br>61 | leukocyte proliferation                  | 23/875 | 0.015526 | 0.136401 | AZI2/CCR2/CD180/CD38/FLT3/HLA-DPB1/HLA-DRB5/ICOSLG/IFNG/IL12A/IL6/LEF1/LGALS9/NCK2/PDE5A/PRDM1/RIPK2/SATB1/SPTA1/TMIGD2/TNFAIP3/TNFRSF21/TNFSF4                                                       | Biological<br>Process |
| GO:00508<br>19 | negative regulation of<br>coagulation    | 7/875  | 0.01554  | 0.136401 | CD34/PDGFB/PLAUR/PRKG1/PROS1/SERPINB2/SERPINE2                                                                                                                                                        | Biological<br>Process |
| GO:00100<br>02 | cardioblast<br>differentiation           | 4/875  | 0.015962 | 0.137333 | EOMES/NRG1/PRICKLE1/RBPJ                                                                                                                                                                              | Biological<br>Process |
| GO:00709       | neuron death                             | 23/875 | 0.016816 | 0.141262 | AGRN/APAF1/BCL2L11/CCL3/CD34/CDK5R1/DDIT4/EPHB1/FAM134B/FASLG/GCLM/IL6/ITGA                                                                                                                           | Biological            |

|            |                                                                           |        |          |          |                                                                                                                                                                |                    |
|------------|---------------------------------------------------------------------------|--------|----------|----------|----------------------------------------------------------------------------------------------------------------------------------------------------------------|--------------------|
| 97         |                                                                           |        |          |          | 1/LGMN/NAIP/NEFL/NLRC4/NRBP2/NRP1/PRKCI/ROCK1/SERPINF1/TNFRSF21                                                                                                | Process            |
| GO:0014808 | release of sequestered calcium ion into cytosol by sarcoplasmic reticulum | 5/875  | 0.016897 | 0.141262 | AKAP6/ASPH/CCL3/CCR5/RYR2                                                                                                                                      | Biological Process |
| GO:1903514 | calcium ion transport from endoplasmic reticulum to cytosol               | 5/875  | 0.016897 | 0.141262 | AKAP6/ASPH/CCL3/CCR5/RYR2                                                                                                                                      | Biological Process |
| GO:0000302 | response to reactive oxygen species                                       | 18/875 | 0.017041 | 0.142172 | CCR7/CYP1B1/HBA1/HBA2/HBB/HGF/IL6/KLF2/LCN2/MPO/NET1/NME8/PLK3/PPARGC1B/SEN1/TNFAIP3/TPM1/TXNIP                                                                | Biological Process |
| GO:0003157 | endocardium development                                                   | 3/875  | 0.017699 | 0.143808 | NRG1/RBPJ/STK3                                                                                                                                                 | Biological Process |
| GO:0045721 | negative regulation of gluconeogenesis                                    | 3/875  | 0.017699 | 0.143808 | IL6/LEPR/SIK1                                                                                                                                                  | Biological Process |
| GO:2000095 | regulation of Wnt signaling pathway; planar cell polarity pathway         | 3/875  | 0.017699 | 0.143808 | DAB2/DACT1/NPHP3                                                                                                                                               | Biological Process |
| GO:0008286 | insulin receptor signaling pathway                                        | 27/875 | 0.017825 | 0.144254 | AKAP9/ATP6V0E2/C2CD5/CSF2RB/DUSP5/DUSP6/EGF/FGF2/FGF9/FRS3/GRB10/IL3RA/KANK1/KL/MAPK3/NEFL/NRG1/OGT/PDGFB/PID1/PRKAB2/PSMC6/RASGEF1A/SOCS1/SPTA1/SPTBN5/SREBF1 | Biological Process |
| GO:0034341 | response to interferon-gamma                                              | 15/875 | 0.018431 | 0.147636 | CCL3/CD58/HLA-DPB1/HLA-DQA2/HLA-DQB1/HLA-DRB5/ICAM1/IFITM1/IFITM2/IFNG/IRF6/KYNU/LGALS9/SLC26A6/SOCS1                                                          | Biological Process |

|            |                                                                                                    |        |          |          |                                                                                                                                                                                                              |                    |
|------------|----------------------------------------------------------------------------------------------------|--------|----------|----------|--------------------------------------------------------------------------------------------------------------------------------------------------------------------------------------------------------------|--------------------|
| GO:0018107 | peptidyl-threonine phosphorylation                                                                 | 9/875  | 0.018575 | 0.147636 | AZU1/CDK5R1/CHI3L1/DDIT4/EGF/PARD3/RIPK2/SPRY2/STOX1                                                                                                                                                         | Biological Process |
| GO:0006979 | response to oxidative stress                                                                       | 29/875 | 0.018608 | 0.147636 | BTG1/CCR7/CD38/CYP1B1/DGKK/GCLM/HBA1/HBA2/HBB/HGF/IL6/IPCEF1/KLF2/LCN2/MGMT/MPO/NET1/NME8/NUDT1/PLK3/PPARGC1B/RAD52/RCAN2/SESN1/STOX1/TNFAIP3/TPM1/TXNIP/VNN1                                                | Biological Process |
| GO:0050777 | negative regulation of immune response                                                             | 12/875 | 0.019773 | 0.152979 | A2M/CCR2/IRAK3/LGALS9/NLRP6/OLFM4/PGLYRP1/RPS19/THOC1/TNF/TNFAIP3/TNFSF4                                                                                                                                     | Biological Process |
| GO:0070613 | regulation of protein processing                                                                   | 9/875  | 0.021674 | 0.163628 | A2M/BIRC3/CFH/LDLRAD3/NAIP/NLRC4/PLGRKT/PROS1/SERPINE2                                                                                                                                                       | Biological Process |
| GO:0090066 | regulation of anatomical structure size                                                            | 34/875 | 0.022196 | 0.163628 | ACTA2/ADD2/ADRB1/AQP10/ARFIP1/ARHGAP18/AVPR1A/CCR7/CD38/CDC42EP1/CDC42EP3/CDK5R1/CFL2/CLCN3/CTTN/EPHX2/EPS8/GCLM/GUCY1A3/HBB/ICAM1/ITGA1/KANK1/LIMA1/NCK2/NEFL/NRCAM/NRP1/PICK1/PRKG1/RDX/SPTA1/SPTBN5/TRPM4 | Biological Process |
| GO:0072599 | establishment of protein localization to endoplasmic reticulum                                     | 12/875 | 0.022309 | 0.163628 | RPL18/RPL18A/RPL28/RPL8/RPS15/RPS18/RPS19/RPS26/RPS4X/RPS5/RYR2/SRP54                                                                                                                                        | Biological Process |
| GO:0040017 | positive regulation of locomotion                                                                  | 29/875 | 0.022615 | 0.163628 | AZU1/CCL3/CCR2/CCR7/CMKLR1/CXCL10/CXCL2/CXCL5/DAB2/FGF2/HGF/ICAM1/IFNG/IL12A/IL6/ITGAV/LEF1/LGALS9/LGR6/MYLK/NRP1/PDGFB/PF4/PPBP/RDX/ROCK2/SPARC/TNF/TRIP6                                                   | Biological Process |
| GO:0002824 | positive regulation of adaptive immune response based on somatic recombination of immune receptors | 8/875  | 0.022646 | 0.163628 | CCR2/FCER2/IFNG/IL12A/RIPK2/STX7/TNF/TNFSF4                                                                                                                                                                  | Biological Process |

|            |                                                          |        |          |          |                                                                                                                        |                    |
|------------|----------------------------------------------------------|--------|----------|----------|------------------------------------------------------------------------------------------------------------------------|--------------------|
|            | built from immunoglobulin superfamily domains            |        |          |          |                                                                                                                        |                    |
| GO:1904037 | positive regulation of epithelial cell apoptotic process | 4/875  | 0.022672 | 0.163628 | CD248/FASLG/IL6/PRKCI                                                                                                  | Biological Process |
| GO:0001774 | microglial cell activation                               | 3/875  | 0.022686 | 0.163628 | AZU1/CX3CR1/TLR8                                                                                                       | Biological Process |
| GO:0051969 | regulation of transmission of nerve impulse              | 3/875  | 0.022686 | 0.163628 | AVPR1A/IFNG/IL6                                                                                                        | Biological Process |
| GO:0072109 | glomerular mesangium development                         | 3/875  | 0.022686 | 0.163628 | ACTA2/CD34/PDGFB                                                                                                       | Biological Process |
| GO:1902603 | carnitine transmembrane transport                        | 3/875  | 0.022686 | 0.163628 | CPT1B/PRKAB2/SLC22A16                                                                                                  | Biological Process |
| GO:0030168 | platelet activation                                      | 21/875 | 0.023864 | 0.170301 | A2M/DGKK/EGF/F2RL2/GNAI1/HBB/HGF/IL6/MAPK14/MAPK3/MERTK/MMRN1/P2RY12/PDGFB/PF4/PLA2G4A/PPBP/PRKG1/PROS1/SERPINE2/SPARC | Biological Process |
| GO:0060205 | cytoplasmic membrane-bounded vesicle lumen               | 18/945 | 2.79E-07 | 7.40E-05 | A2M/CLCN3/DEFA1/DEFA1B/DEFA3/EGF/FASLG/HBA1/HBA2/HBB/HGF/LTF/MMRN1/PDGFB/PF4/PPBP/PROS1/SPARC                          | Cellular Component |
| GO:0031983 | vesicle lumen                                            | 18/945 | 3.38E-07 | 7.40E-05 | A2M/CLCN3/DEFA1/DEFA1B/DEFA3/EGF/FASLG/HBA1/HBA2/HBB/HGF/LTF/MMRN1/PDGFB/PF4/PPBP/PROS1/SPARC                          | Cellular Component |

|            |                                   |        |          |          |                                                                                                                                                                                                                           |                    |
|------------|-----------------------------------|--------|----------|----------|---------------------------------------------------------------------------------------------------------------------------------------------------------------------------------------------------------------------------|--------------------|
| GO:0005833 | hemoglobin complex                | 7/945  | 7.39E-07 | 0.000108 | AHSP/HBA1/HBA2/HBB/HBD/HBG1/HBG2                                                                                                                                                                                          | Cellular Component |
| GO:0005766 | primary lysosome                  | 7/945  | 8.84E-06 | 0.000774 | AZU1/DEFA1/DEFA1B/DEFA3/DEFA4/MPO/STX7                                                                                                                                                                                    | Cellular Component |
| GO:0042582 | azurophil granule                 | 7/945  | 8.84E-06 | 0.000774 | AZU1/DEFA1/DEFA1B/DEFA3/DEFA4/MPO/STX7                                                                                                                                                                                    | Cellular Component |
| GO:0032588 | trans-Golgi network membrane      | 9/945  | 0.000988 | 0.035359 | ARFIP1/GOLPH3L/HLA-DPB1/HLA-DQA2/HLA-DQB1/HLA-DRB5/LGR6/SCAMP5/TMEM165                                                                                                                                                    | Cellular Component |
| GO:0022627 | cytosolic small ribosomal subunit | 8/945  | 0.001048 | 0.035359 | HBA1/HBA2/RPS15/RPS18/RPS19/RPS26/RPS4X/RPS5                                                                                                                                                                              | Cellular Component |
| GO:0000786 | nucleosome                        | 14/945 | 0.001098 | 0.035359 | H1FX/H3F3A/HIST1H1A/HIST1H2AK/HIST1H2AL/HIST1H2BL/HIST1H2BN/HIST1H2BO/HIST1H3A/HIST1H3B/HIST1H3C/HIST1H4A/HIST2H3A/HIST2H3C                                                                                               | Cellular Component |
| GO:0042613 | MHC class II protein complex      | 5/945  | 0.001126 | 0.035359 | HLA-DMA/HLA-DPB1/HLA-DQA2/HLA-DQB1/HLA-DRB5                                                                                                                                                                               | Cellular Component |
| GO:0009897 | external side of plasma membrane  | 24/945 | 0.00113  | 0.035359 | CCR5/CCR7/CD34/CD69/CD83/CD8B/CLCN3/CXCL10/FASLG/FCER2/FLT3/FLT3LG/HLA-DRB5/ICAM1/IFNG/IL6/ITGA1/ITGAV/LAG3/NRCAM/P2RY12/SCNN1A/SERPINE2/TNF                                                                              | Cellular Component |
| GO:0001726 | ruffle                            | 18/945 | 0.001519 | 0.041769 | C2CD5/CTTN/EPHA2/EPH2/EPH3/EPH4/FRMD4B/ITGAV/KANK1/LAYN/MYO10/NME1/PACSIN1/PDE9A/RDX/ROCK1/S100B/SPRY2/TPM1                                                                                                               | Cellular Component |
| GO:0044815 | DNA packaging complex             | 14/945 | 0.001906 | 0.046377 | H1FX/H3F3A/HIST1H1A/HIST1H2AK/HIST1H2AL/HIST1H2BL/HIST1H2BN/HIST1H2BO/HIST1H3A/HIST1H3B/HIST1H3C/HIST1H4A/HIST2H3A/HIST2H3C                                                                                               | Cellular Component |
| GO:0098552 | side of membrane                  | 36/945 | 0.002444 | 0.056327 | CCR5/CCR7/CD34/CD69/CD83/CD8B/CLCN3/CXCL10/ERRFI1/FASLG/FCER2/FLT3/FLT3LG/GNAI1/GNG11/HLA-DPB1/HLA-DQA2/HLA-DQB1/HLA-DRB5/ICAM1/IFNG/IL6/ITGA1/ITGAV/ITK/JUP/LAG3/NRCAM/NTSR1/P2RY12/RGS9/SCNN1A/SERPINE2/SPTA1/STYK1/TNF | Cellular Component |

|            |                                            |        |          |          |                                                                                                                                                                                                    |                    |
|------------|--------------------------------------------|--------|----------|----------|----------------------------------------------------------------------------------------------------------------------------------------------------------------------------------------------------|--------------------|
| GO:0005925 | focal adhesion                             | 34/945 | 0.00316  | 0.069196 | ARHGAP24/CASS4/CDC42EP1/CTTN/DAB2/DIXDC1/EPHA2/FZD2/HMGA1/ICAM1/ITGA1/ITGAV/JUP/LAYN/LIMA1/LIMS1/LIMS2/MAPK3/MME/NEXN/NRP1/PLAUR/RDX/RHO/RPL18/RPL8/RPS15/RPS18/RPS19/RPS4X/RPS5/TGM2/TRIP6/TSPAN4 | Cellular Component |
| GO:0030055 | cell-substrate junction                    | 34/945 | 0.004515 | 0.085951 | ARHGAP24/CASS4/CDC42EP1/CTTN/DAB2/DIXDC1/EPHA2/FZD2/HMGA1/ICAM1/ITGA1/ITGAV/JUP/LAYN/LIMA1/LIMS1/LIMS2/MAPK3/MME/NEXN/NRP1/PLAUR/RDX/RHO/RPL18/RPL8/RPS15/RPS18/RPS19/RPS4X/RPS5/TGM2/TRIP6/TSPAN4 | Cellular Component |
| GO:0032993 | protein-DNA complex                        | 17/945 | 0.007353 | 0.121278 | H1FX/H3F3A/HIST1H1A/HIST1H2AK/HIST1H2AL/HIST1H2BL/HIST1H2BN/HIST1H2BO/HIST1H3A/HIST1H3B/HIST1H3C/HIST1H4A/HIST2H3A/HIST2H3C/JUND/JUP/LEF1                                                          | Cellular Component |
| GO:0032587 | ruffle membrane                            | 10/945 | 0.007478 | 0.121278 | C2CD5/EPHA2/EP8/ITGAV/KANK1/NME1/PACIN1/PDE9A/SPRY2/TPM1                                                                                                                                           | Cellular Component |
| GO:0005938 | cell cortex                                | 21/945 | 0.012955 | 0.171909 | ASPH/C2CD5/CALD1/CLIC5/CTTN/CYTIP/EPB42/EP8/FNBP1L/MYO10/MYO5B/PARD3/PDZD4/PLA2G4C/RDX/SCNN1A/SEPT6/SLC4A1/SPTA1/SPTBN5/STOX1                                                                      | Cellular Component |
| GO:0014701 | junctional sarcoplasmic reticulum membrane | 3/945  | 0.013595 | 0.175098 | AKAP6/ASPH/RYR2                                                                                                                                                                                    | Cellular Component |
| GO:0031225 | anchored component of membrane             | 15/945 | 0.014736 | 0.184362 | ALPL/CD58/CEACAM6/CEACAM8/FCGR3B/LPL/LY6E/LYPD3/MDGA1/MMP25/PLAUR/RGMB/TFPI/TNFRSF10C/VNN1                                                                                                         | Cellular Component |
| GO:0005868 | cytoplasmic dynein complex                 | 5/945  | 0.017274 | 0.208155 | DNAH8/DYNC1LI2/DYNLL1/DYNLT3/NME8                                                                                                                                                                  | Cellular Component |
| GO:0034704 | calcium channel complex                    | 8/945  | 0.018063 | 0.208155 | AKAP6/ASPH/CACNA2D2/CACNB1/HERPUD1/PDE4B/RYR2/SMDT1                                                                                                                                                | Cellular Component |
| GO:0032420 | stereocilium                               | 5/945  | 0.022655 | 0.243255 | ATP8B1/CLIC5/EP8/LOXHD1/RDX                                                                                                                                                                        | Cellular Component |

|                |                                                           |        |          |          |                                                                                                                                |                       |
|----------------|-----------------------------------------------------------|--------|----------|----------|--------------------------------------------------------------------------------------------------------------------------------|-----------------------|
| GO:19025<br>55 | endoribonuclease<br>complex                               | 4/945  | 0.02309  | 0.243255 | CLP1/DICER1/POP1/RPP40                                                                                                         | Cellular<br>Component |
| GO:00725<br>62 | blood microparticle                                       | 13/945 | 0.026346 | 0.256375 | A1BG/A2M/CFH/HBA1/HBA2/HBB/HBD/HBG2/LGALS3BP/ORM1/PROS1/SLC4A1/STOM                                                            | Cellular<br>Component |
| GO:00319<br>01 | early endosome<br>membrane                                | 11/945 | 0.028667 | 0.27289  | ATP9A/CD8B/CLCN3/EPHB1/LAMP5/OCRL/PLA2G4B/STX7/TICAM2/TMEM165/ZFYVE16                                                          | Cellular<br>Component |
| GO:00053<br>44 | oxygen transporter<br>activity                            | 7/872  | 2.65E-06 | 0.000679 | HBA1/HBA2/HBB/HBD/HBG1/HBG2/IPCEF1                                                                                             | Molecular<br>Function |
| GO:00016<br>37 | G-protein coupled<br>chemoattractant<br>receptor activity | 9/872  | 2.76E-06 | 0.000679 | CCR2/CCR3/CCR5/CCR7/CMKLR1/CX3CR1/CXCR1/CXCR2/CXCR4                                                                            | Molecular<br>Function |
| GO:00049<br>50 | chemokine receptor<br>activity                            | 9/872  | 2.76E-06 | 0.000679 | CCR2/CCR3/CCR5/CCR7/CMKLR1/CX3CR1/CXCR1/CXCR2/CXCR4                                                                            | Molecular<br>Function |
| GO:00510<br>18 | protein kinase A<br>binding                               | 9/872  | 0.000222 | 0.03275  | AKAP3/AKAP6/AKAP9/C2orf88/DACT1/PRKAR1B/PRKAR2B/RDX/RYR2                                                                       | Molecular<br>Function |
| GO:00055<br>39 | glycosaminoglycan<br>binding                              | 22/872 | 0.000636 | 0.050937 | AGRN/AZU1/CFH/COL5A3/CTSG/CXCL10/ELANE/FGF2/FGF9/FGFBP3/FSTL1/LAYN/LIPC/LPL<br>/LTF/MPO/NELL2/NRP1/PF4/PGLYRP1/PODXL2/SERPINE2 | Molecular<br>Function |
| GO:00051<br>64 | tumor necrosis factor<br>receptor binding                 | 7/872  | 0.000752 | 0.050937 | FASLG/LTB/TNF/TNFSF10/TNFSF4/TNFSF8/TRAF4                                                                                      | Molecular<br>Function |
| GO:00082<br>01 | heparin binding                                           | 18/872 | 0.000756 | 0.050937 | AZU1/CFH/COL5A3/CTSG/CXCL10/ELANE/FGF2/FGF9/FGFBP3/FSTL1/LIPC/LPL/LTF/MPO/NE<br>LL2/NRP1/PF4/SERPINE2                          | Molecular<br>Function |
| GO:00199<br>56 | chemokine binding                                         | 5/872  | 0.000759 | 0.050937 | A2M/CCR5/CCR7/CXCR1/CXCR2                                                                                                      | Molecular<br>Function |

|                |                                          |        |          |          |                                                                                                                                                                                                                                               |                       |
|----------------|------------------------------------------|--------|----------|----------|-----------------------------------------------------------------------------------------------------------------------------------------------------------------------------------------------------------------------------------------------|-----------------------|
| GO:00452<br>36 | CXCR chemokine<br>receptor binding       | 5/872  | 0.001433 | 0.088138 | CXCL10/CXCL2/CXCL5/PF4/PPBP                                                                                                                                                                                                                   | Molecular<br>Function |
| GO:00046<br>20 | phospholipase activity                   | 12/872 | 0.002544 | 0.122439 | CCR5/F2RL2/LIPC/LPL/NAPEPLD/PLA2G12A/PLA2G4A/PLA2G4B/PLA2G4C/PLCH1/PLD1/PLD4                                                                                                                                                                  | Molecular<br>Function |
| GO:00352<br>50 | UDP-galactosyltransferase activity       | 5/872  | 0.00315  | 0.136734 | B3GALNT1/B3GALT2/B4GALT2/UGT8/WDFY3                                                                                                                                                                                                           | Molecular<br>Function |
| GO:00080<br>47 | enzyme activator<br>activity             | 37/872 | 0.004649 | 0.180559 | AFAP1L2/AGAP1/AGFG1/AHSA2/APAF1/ARHGAP18/ARHGAP23/ARHGAP24/ARHGAP29/ATP1B2/CCL3/CDC42EP1/CDC42EP3/CDK5R1/DNAJB1/EGF/ELMOD2/ERRFI1/LTF/MAL/MOB1B/NRG1/OCRL/OGT/PDGFB/RGS1/RGS18/RGS9/RIN2/SPRY2/SRGAP1/SRGAP2/STK3/SYDE2/TBC1D16/TBC1D8B/TIAM2 | Molecular<br>Function |
| GO:00469<br>06 | tetrapyrrole binding                     | 15/872 | 0.005163 | 0.190476 | CYP1B1/CYP4F22/FECH/GUCY1A3/HBA1/HBA2/HBB/HBD/HBG1/HBG2/MPO/MUT/PGRMC1/PTGIS/TCN1                                                                                                                                                             | Molecular<br>Function |
| GO:00080<br>81 | phosphoric diester<br>hydrolase activity | 11/872 | 0.006208 | 0.218148 | CCR5/F2RL2/NAPEPLD/PDE3A/PDE4B/PDE5A/PDE7B/PDE9A/PLCH1/PLD1/PLD4                                                                                                                                                                              | Molecular<br>Function |
| GO:19016<br>81 | sulfur compound<br>binding               | 21/872 | 0.006947 | 0.232862 | AGRN/AZU1/CD34/CFH/COL5A3/CTSG/CXCL10/ELANE/FGF2/FGF9/FGFBP3/FSTL1/LIPC/LPL/LTF/MPO/NELL2/NRP1/PF4/RYR2/SERPINE2                                                                                                                              | Molecular<br>Function |
| GO:00170<br>49 | GTP-Rho binding                          | 4/872  | 0.008254 | 0.234258 | CDC42EP1/CDC42EP3/NET1/ROCK2                                                                                                                                                                                                                  | Molecular<br>Function |
| GO:00305<br>51 | cyclic nucleotide<br>binding             | 6/872  | 0.010358 | 0.255493 | PDE3A/PDE4B/PDE5A/PRKAR1B/PRKAR2B/PRKG1                                                                                                                                                                                                       | Molecular<br>Function |
| GO:00198<br>25 | oxygen binding                           | 7/872  | 0.010734 | 0.255493 | CYP1B1/HBA1/HBA2/HBB/HBD/HBG1/HBG2                                                                                                                                                                                                            | Molecular<br>Function |
| GO:00508       | extracellular matrix                     | 7/872  | 0.010734 | 0.255493 | AGRN/CD248/FBLN2/ITGAV/LYPD3/NTN4/SPARC                                                                                                                                                                                                       | Molecular             |

|            |                                                |        |          |          |                                                                                                                                                     |                    |
|------------|------------------------------------------------|--------|----------|----------|-----------------------------------------------------------------------------------------------------------------------------------------------------|--------------------|
| 40         | binding                                        |        |          |          |                                                                                                                                                     | Function           |
| GO:0005080 | protein kinase C binding                       | 7/872  | 0.014895 | 0.297061 | AVPR1A/DACT1/ITGAV/NELL2/PARD3/PICK1/SDPR                                                                                                           | Molecular Function |
| GO:0019843 | rRNA binding                                   | 7/872  | 0.014895 | 0.297061 | ERI1/RPF2/RPL8/RPS18/RPS4X/RPS5/SBDS                                                                                                                | Molecular Function |
| GO:0015643 | toxic substance binding                        | 3/872  | 0.017303 | 0.327386 | AZU1/EPHX2/TMEM181                                                                                                                                  | Molecular Function |
| GO:0015106 | bicarbonate transmembrane transporter activity | 4/872  | 0.018606 | 0.343231 | SLC26A2/SLC26A6/SLC4A1/SLC4A10                                                                                                                      | Molecular Function |
| GO:0016209 | antioxidant activity                           | 8/872  | 0.02752  | 0.425979 | APOM/FAM213A/HBA1/HBA2/HBB/IPCEF1/MPO/TXNRD3                                                                                                        | Molecular Function |
| GO:0070402 | NADPH binding                                  | 3/872  | 0.027739 | 0.425979 | CBR3/CBR4/CRYZ                                                                                                                                      | Molecular Function |
| GO:1901981 | phosphatidylinositol phosphate binding         | 11/872 | 0.027825 | 0.425979 | APBA1/ARFIP1/GOLPH3L/KCNJ1/MYO10/NCF1/OGT/PARD3/SH3PXD2B/SYTL2/ZFYVE16                                                                              | Molecular Function |
| GO:0005096 | GTPase activator activity                      | 21/872 | 0.028734 | 0.425979 | AGAP1/AGFG1/ARHGAP18/ARHGAP23/ARHGAP24/ARHGAP29/CDC42EP1/CDC42EP3/ELMOD2/ERRFI1/OCRL/RGS1/RGS18/RGS9/RIN2/SRGAP1/SRGAP2/SYDE2/TBC1D16/TBC1D8B/TIAM2 | Molecular Function |
| GO:0030246 | carbohydrate binding                           | 22/872 | 0.029426 | 0.425979 | CD248/CD34/CD69/CHI3L1/CLEC11A/CLEC4C/CLEC4D/CLEC5A/CRYBG3/DCBLD1/FCER2/KLRC2/KLRG1/LAYN/LGALS2/LGALS9/LGALS9B/LGALSL/NOMO3/OLR1/PAM/PLOD2          | Molecular Function |
| GO:0003823 | antigen binding                                | 10/872 | 0.032715 | 0.45588  | HLA-DMA/HLA-DPB1/HLA-DQB1/HLA-DRB5/KIR2DL3/KLRC2/LAG3/LILRA2/SLC7A5/TSPAN4                                                                          | Molecular Function |
| GO:00150   | magnesium ion                                  | 3/872  | 0.033958 | 0.45588  | NIPA1/NIPA2/NIPAL2                                                                                                                                  | Molecular          |

|                |                                                  |        |          |          |                                                                                                                                                                                |                       |
|----------------|--------------------------------------------------|--------|----------|----------|--------------------------------------------------------------------------------------------------------------------------------------------------------------------------------|-----------------------|
| 95             | transmembrane<br>transporter activity            |        |          |          |                                                                                                                                                                                | Function              |
| GO:00342<br>36 | protein kinase A<br>catalytic subunit<br>binding | 3/872  | 0.033958 | 0.45588  | PRKAR1B/PRKAR2B/RYR2                                                                                                                                                           | Molecular<br>Function |
| GO:00305<br>52 | cAMP binding                                     | 4/872  | 0.034602 | 0.45588  | PDE3A/PDE4B/PRKAR1B/PRKAR2B                                                                                                                                                    | Molecular<br>Function |
| GO:00605<br>89 | nucleoside-triphosphat<br>ase regulator activity | 24/872 | 0.038218 | 0.463553 | AGAP1/AGFG1/AHSA2/ARHGAP18/ARHGAP23/ARHGAP24/ARHGAP29/ATP1B2/CDC42EP1/C<br>DC42EP3/DNAJB1/ELMOD2/ERRF1/OCRL/RGS1/RGS18/RGS9/RIN2/SRGAP1/SRGAP2/SYDE2/<br>TBC1D16/TBC1D8B/TIAM2 | Molecular<br>Function |
| GO:00153<br>01 | anion:anion antiporter<br>activity               | 5/872  | 0.038472 | 0.463553 | SLC26A2/SLC26A6/SLC4A1/SLC4A10/SLC4A3                                                                                                                                          | Molecular<br>Function |
| GO:00168<br>66 | intramolecular<br>transferase activity           | 4/872  | 0.039538 | 0.463553 | BPGM/MUT/PGM3/RPUSD2                                                                                                                                                           | Molecular<br>Function |
| GO:00420<br>56 | chemoattractant<br>activity                      | 4/872  | 0.039538 | 0.463553 | CCL3/FGF2/HGF/PDGFB                                                                                                                                                            | Molecular<br>Function |
| GO:00168<br>54 | racemase and<br>epimerase activity               | 3/872  | 0.040834 | 0.463553 | AMACR/DSEL/RPE                                                                                                                                                                 | Molecular<br>Function |
| GO:00527<br>45 | inositol phosphate<br>phosphatase activity       | 3/872  | 0.040834 | 0.463553 | MINPP1/OCRL/SYNJ1                                                                                                                                                              | Molecular<br>Function |

**Table 2. GO enrichment analysis about circRNA**

| GO_ID      | Description                                               | GeneRatio | pvalue   | qvalue   | geneID                                                                                                       | GO_domain          |
|------------|-----------------------------------------------------------|-----------|----------|----------|--------------------------------------------------------------------------------------------------------------|--------------------|
| GO:0006997 | nucleus organization                                      | 10/257    | 2.38E-05 | 0.047335 | ZMPSTE24/NUP107/USPL1/SYNE2/AGFG1/UBXN2A/CCNB1/TBPL1/SYNE1/NUPL2                                             | Biological Process |
| GO:0018205 | peptidyl-lysine modification                              | 17/257    | 5.23E-05 | 0.047335 | ASH1L/ARID4B/SMYD3/MGEA5/NUP107/USPL1/SETDB2/CREBBP/UBA2/PHC3/SETD2/LEF1/SENAP2/ENP6/KMT2C/NUPL2/AUTS2/EHMT1 | Biological Process |
| GO:0016571 | histone methylation                                       | 9/257     | 6.73E-05 | 0.047335 | ASH1L/ARID4B/SMYD3/SETDB2/SATB1/SETD2/KMT2C/AUTS2/EHMT1                                                      | Biological Process |
| GO:0034968 | histone lysine methylation                                | 8/257     | 7.28E-05 | 0.047335 | ASH1L/ARID4B/SMYD3/SETDB2/SETD2/KMT2C/AUTS2/EHMT1                                                            | Biological Process |
| GO:0038095 | Fc-epsilon receptor signaling pathway                     | 15/257    | 0.000128 | 0.049414 | PTEN/UBC/RASA3/NF1/MALT1/NFATC2/CSF2RB/PAK2/EGF/SKP1/UBE2D2/RICTOR/AKAP9/PTK2/SH2B3/TK2/MAPKAP1              | Biological Process |
| GO:1903364 | positive regulation of cellular protein catabolic process | 11/257    | 0.000133 | 0.049414 | RFWD2/PTEN/VPS11/UBC/ARIH1/RNF138/EGF/SKP1/CCNB1/PTK2/UBE2V2                                                 | Biological Process |
| GO:0016569 | covalent chromatin modification                           | 17/257    | 0.000348 | 0.082174 | ASH1L/SKI/ARID4B/SMYD3/MGEA5/ATM/SETDB2/CREBBP/SATB1/SETD2/LEF1/SKP1/CCNB1/UBR2/KMT2C/AUTS2/EHMT1            | Biological Process |
| GO:0071044 | histone mRNA catabolic process                            | 3/257     | 0.000411 | 0.082174 | ATM/DCP2/PAPD4                                                                                               | Biological Process |
| GO:0042059 | negative regulation of epidermal growth factor receptor   | 5/257     | 0.000518 | 0.088335 | AP2A2/CBL/UBC/EGF/SH3KBP1                                                                                    | Biological Process |

|                |                                                                                                |        |          |          |                                                                          |                       |
|----------------|------------------------------------------------------------------------------------------------|--------|----------|----------|--------------------------------------------------------------------------|-----------------------|
|                | signaling pathway                                                                              |        |          |          |                                                                          |                       |
| GO:19011<br>85 | negative regulation of<br>ERBB signaling<br>pathway                                            | 5/257  | 0.000577 | 0.088335 | AP2A2/CBL/UBC/EGF/SH3KBP1                                                | Biological<br>Process |
| GO:00313<br>96 | regulation of protein<br>ubiquitination                                                        | 12/257 | 0.000816 | 0.113685 | PTEN/ATM/UBC/MALT1/UBXN2A/EGF/DCUN1D4/SKP1/CCNB1/PTK2/DNAJA1/CDC14B      | Biological<br>Process |
| GO:00069<br>98 | nuclear envelope<br>organization                                                               | 6/257  | 0.000881 | 0.114605 | ZMPSTE24/NUP107/SYNE2/UBXN2A/CCNB1/NUPL2                                 | Biological<br>Process |
| GO:00085<br>43 | fibroblast growth<br>factor receptor<br>signaling pathway                                      | 13/257 | 0.001202 | 0.133791 | SHOC2/PTEN/CBL/UBC/RASA3/NF1/CSF2RB/EGF/RICTOR/AKAP9/PTK2/MAPKAP1/SETX   | Biological<br>Process |
| GO:00063<br>52 | DNA-templated<br>transcription; initiation                                                     | 13/257 | 0.001311 | 0.133791 | TRIM33/SKI/PTEN/MED17/UBC/CREBBP/MED13/SMAD2/GLS/NR2C2/TBPL1/PRKAG2/SETX | Biological<br>Process |
| GO:00400<br>23 | establishment of<br>nucleus localization                                                       | 3/257  | 0.00147  | 0.133791 | SYNE2/SYNE1/PTK2                                                         | Biological<br>Process |
| GO:00900<br>68 | positive regulation of<br>cell cycle process                                                   | 11/257 | 0.001614 | 0.133791 | RFWD2/PKN2/PTEN/ATM/UBC/CREBBP/SPAST/LEF1/EGF/CCNB1/CSPP1                | Biological<br>Process |
| GO:00614<br>18 | regulation of<br>transcription from<br>RNA polymerase II<br>promoter in response<br>to hypoxia | 4/257  | 0.001636 | 0.133791 | UBC/CREBBP/BACH1/UBE2D2                                                  | Biological<br>Process |
| GO:00511       | nuclear export                                                                                 | 8/257  | 0.002314 | 0.158359 | UPF2/BUD13/NUP107/MALT1/AGFG1/SETD2/PHAX/NUPL2                           | Biological            |

|                |                                                                          |        |          |          |                                                                        |                       |
|----------------|--------------------------------------------------------------------------|--------|----------|----------|------------------------------------------------------------------------|-----------------------|
| 68             |                                                                          |        |          |          |                                                                        | Process               |
| GO:00717<br>74 | response to fibroblast<br>growth factor                                  | 13/257 | 0.002381 | 0.158811 | SHOC2/PTEN/CBL/UBC/RASA3/NF1/CSF2RB/EGF/RICTOR/AKAP9/PTK2/MAPKAP1/SETX | Biological<br>Process |
| GO:00434<br>84 | regulation of RNA<br>splicing                                            | 6/257  | 0.002634 | 0.160168 | DYRK1A/MBNL1/HNRNPA2B1/PTBP3/SETX/AFF2                                 | Biological<br>Process |
| GO:00000<br>86 | G2/M transition of<br>mitotic cell cycle                                 | 9/257  | 0.002652 | 0.160168 | ATM/UBC/CEP192/BACH1/CEP70/SKP1/CCNB1/CDK14/AKAP9                      | Biological<br>Process |
| GO:00064<br>05 | RNA export from<br>nucleus                                               | 6/257  | 0.002786 | 0.160168 | UPF2/BUD13/NUP107/AGFG1/SETD2/PHAX                                     | Biological<br>Process |
| GO:00022<br>23 | stimulatory C-type<br>lectin receptor<br>signaling pathway               | 7/257  | 0.002836 | 0.160168 | UBC/CREBBP/MALT1/NFATC2/PAK2/SKP1/UBE2D2                               | Biological<br>Process |
| GO:00719<br>01 | negative regulation of<br>protein<br>serine/threonine kinase<br>activity | 7/257  | 0.00297  | 0.160168 | PDCD4/PTEN/NF1/CD300A/STK38/PRKAG2/DNAJA1                              | Biological<br>Process |
| GO:00480<br>25 | negative regulation of<br>mRNA splicing; via<br>spliceosome              | 3/257  | 0.00299  | 0.160168 | DYRK1A/HNRNPA2B1/PTBP3                                                 | Biological<br>Process |
| GO:00313<br>31 | positive regulation of<br>cellular catabolic<br>process                  | 12/257 | 0.003024 | 0.160168 | RFWD2/PTEN/VPS11/UBC/ARIH1/RNF138/TBC1D5/EGF/SKP1/CCNB1/PTK2/UBE2V2    | Biological<br>Process |
| GO:00448       | cell cycle G2/M phase                                                    | 9/257  | 0.003054 | 0.160168 | ATM/UBC/CEP192/BACH1/CEP70/SKP1/CCNB1/CDK14/AKAP9                      | Biological            |

|                |                                                                                              |        |          |          |                                                                                  |                       |
|----------------|----------------------------------------------------------------------------------------------|--------|----------|----------|----------------------------------------------------------------------------------|-----------------------|
| 39             | transition                                                                                   |        |          |          |                                                                                  | Process               |
| GO:00022<br>20 | innate immune<br>response activating cell<br>surface receptor<br>signaling pathway           | 7/257  | 0.003252 | 0.160168 | UBC/CREBBP/MALT1/NFATC2/PAK2/SKP1/UBE2D2                                         | Biological<br>Process |
| GO:00506<br>57 | nucleic acid transport                                                                       | 8/257  | 0.003321 | 0.160168 | UPF2/BUD13/NUP107/AGFG1/SETD2/PHAX/NUPL2/HNRNPA2B1                               | Biological<br>Process |
| GO:00506<br>58 | RNA transport                                                                                | 8/257  | 0.003321 | 0.160168 | UPF2/BUD13/NUP107/AGFG1/SETD2/PHAX/NUPL2/HNRNPA2B1                               | Biological<br>Process |
| GO:00512<br>36 | establishment of RNA<br>localization                                                         | 8/257  | 0.003321 | 0.160168 | UPF2/BUD13/NUP107/AGFG1/SETD2/PHAX/NUPL2/HNRNPA2B1                               | Biological<br>Process |
| GO:00019<br>33 | negative regulation of<br>protein<br>phosphorylation                                         | 13/257 | 0.003378 | 0.160168 | ASH1L/SMYD3/PDCD4/PTEN/NF1/CD300A/STK39/PAK2/PDE4D/CCNB1/STK38/PRKAG2/DNAJ<br>A1 | Biological<br>Process |
| GO:00702<br>07 | protein<br>homotrimerization                                                                 | 3/257  | 0.003478 | 0.161552 | SKI/NELL2/ATXN10                                                                 | Biological<br>Process |
| GO:00466<br>21 | negative regulation of<br>organ growth                                                       | 3/257  | 0.004012 | 0.173911 | PTEN/PTK2/WWC3                                                                   | Biological<br>Process |
| GO:00427<br>87 | protein ubiquitination<br>involved in<br>ubiquitin-dependent<br>protein catabolic<br>process | 8/257  | 0.004318 | 0.181138 | PTEN/UBC/ARIH1/EGF/SKP1/CCNB1/UBE3C/PTK2                                         | Biological<br>Process |

|            |                              |        |          |          |                                                                                                                       |                    |
|------------|------------------------------|--------|----------|----------|-----------------------------------------------------------------------------------------------------------------------|--------------------|
| GO:0005813 | centrosome                   | 19/266 | 0.000108 | 0.03021  | RFWD2/SKI/PKN2/ANKRD26/C2CD3/NUP107/CEP128/CEP192/CTDP1/SPAST/CCDC14/CEP70/MBNL1/SCLT1/PDE4D/CCNB1/AKAP9/VPS37A/CSPP1 | Cellular Component |
| GO:0005795 | Golgi stack                  | 8/266  | 0.000562 | 0.078627 | CSGALNACT2/SGMS1/SCFD1/GOSR1/RAB27B/ASAP2/B4GALT5/AKAP9                                                               | Cellular Component |
| GO:0005667 | transcription factor complex | 12/266 | 0.001707 | 0.159278 | SKI/MED17/CREBBP/RBL2/SMAD2/SATB2/GTF3C2/REL/NFATC2/LEF1/SMAD5/TBPL1                                                  | Cellular Component |
| GO:0005801 | cis-Golgi network            | 4/266  | 0.003521 | 0.197172 | SCFD1/GOSR1/UBXN2A/AKAP9                                                                                              | Cellular Component |
| GO:0016604 | nuclear body                 | 12/266 | 0.005746 | 0.221504 | RFWD2/SKI/PTEN/USPL1/CREBBP/PRPF40A/SP3/DYRK1A/SATB1/RAD54L2/PHAX/AFF2                                                | Cellular Component |
| GO:0005635 | nuclear envelope             | 13/266 | 0.006259 | 0.221504 | CEPT1/ATF6/ZMPSTE24/NUP107/SYNE2/BNIP2/AGFG1/C2orf42/CEP70/SYNE1/NUPL2/CDC14B/TXLNG                                   | Cellular Component |
| GO:0031965 | nuclear membrane             | 10/266 | 0.007157 | 0.221504 | CEPT1/ZMPSTE24/NUP107/SYNE2/C2orf42/CEP70/SYNE1/NUPL2/CDC14B/TXLNG                                                    | Cellular Component |
| GO:0000151 | ubiquitin ligase complex     | 9/266  | 0.008445 | 0.221504 | MED17/ARIH1/PHC3/DCUN1D4/SKP1/UBE2D2/OTULIN/UBR2/DNAJA1                                                               | Cellular Component |
| GO:0031010 | ISWI-type complex            | 2/266  | 0.009289 | 0.221504 | BAZ1A/BPTF                                                                                                            | Cellular Component |
| GO:0030122 | AP-2 adaptor complex         | 2/266  | 0.011242 | 0.221504 | AP2A2/TBC1D5                                                                                                          | Cellular Component |
| GO:1902911 | protein kinase complex       | 5/266  | 0.012408 | 0.221504 | ERC1/TBC1D5/MAP3K5/PRKAG2/CDK14                                                                                       | Cellular Component |
| GO:00301   | clathrin coat of             | 2/266  | 0.013358 | 0.221504 | AP2A2/TBC1D5                                                                                                          | Cellular           |

|            |                                                                    |        |          |          |                                                                                                                               |                    |
|------------|--------------------------------------------------------------------|--------|----------|----------|-------------------------------------------------------------------------------------------------------------------------------|--------------------|
| 28         | endocytic vesicle                                                  |        |          |          |                                                                                                                               | Component          |
| GO:0038201 | TOR complex                                                        | 2/266  | 0.013358 | 0.221504 | RICTOR/MAPKAP1                                                                                                                | Cellular Component |
| GO:0098562 | cytoplasmic side of membrane                                       | 7/266  | 0.013448 | 0.221504 | PTEN/ATP2B1/RASA3/NF1/ESYT2/PTK2/DNAJA1                                                                                       | Cellular Component |
| GO:0000940 | condensed chromosome outer kinetochore                             | 2/266  | 0.015632 | 0.243169 | CREBBP/CCNB1                                                                                                                  | Cellular Component |
| GO:0043218 | compact myelin                                                     | 2/266  | 0.018059 | 0.266138 | PTEN/MBP                                                                                                                      | Cellular Component |
| GO:0031235 | intrinsic component of the cytoplasmic side of the plasma membrane | 2/266  | 0.020634 | 0.271784 | RASA3/NF1                                                                                                                     | Cellular Component |
| GO:0030136 | clathrin-coated vesicle                                            | 6/266  | 0.022762 | 0.271784 | DENND1B/AP2A2/VPS11/RAB27A/RAB27B/TBC1D5                                                                                      | Cellular Component |
| GO:0030132 | clathrin coat of coated pit                                        | 2/266  | 0.023352 | 0.271784 | AP2A2/TBC1D5                                                                                                                  | Cellular Component |
| GO:0017053 | transcriptional repressor complex                                  | 4/266  | 0.023923 | 0.271784 | SKI/MIER1/SP3/APPL1                                                                                                           | Cellular Component |
| GO:0008047 | enzyme activator activity                                          | 21/262 | 9.78E-06 | 0.003704 | RABGAP1L/RAB4A/RASA3/BNIP2/NF1/ACAP1/TBCD/MALT1/UBA2/CFLAR/AGFG1/AHSA2/SAP2/DEPDC5/TBC1D5/PAK2/EGF/RICTOR/IQGAP2/PRKAG2/ASAP1 | Molecular Function |
| GO:0018024 | histone-lysine N-methyltransferase                                 | 6/262  | 6.19E-05 | 0.011732 | ASH1L/SMYD3/SETDB2/SETD2/KMT2C/EHMT1                                                                                          | Molecular Function |

|                |                                                                              |        |          |          |                                                                                            |                       |
|----------------|------------------------------------------------------------------------------|--------|----------|----------|--------------------------------------------------------------------------------------------|-----------------------|
|                | activity                                                                     |        |          |          |                                                                                            |                       |
| GO:00420<br>54 | histone<br>methyltransferase<br>activity                                     | 6/262  | 0.000243 | 0.018432 | ASH1L/SMYD3/SETDB2/SETD2/KMT2C/EHMT1                                                       | Molecular<br>Function |
| GO:00605<br>89 | nucleoside-triphosphat<br>ase regulator activity                             | 14/262 | 0.000437 | 0.027608 | RABGAP1L/RAB4A/RASA3/BNIP2/NF1/ACAP1/TBCD/AGFG1/AHSA2/ASAP2/DEPDC5/TBC1D5<br>/IQGAP2/ASAP1 | Molecular<br>Function |
| GO:00048<br>42 | ubiquitin-protein<br>transferase activity                                    | 14/262 | 0.001199 | 0.051118 | TRIM33/RFWD2/CBL/MED17/RNF10/ARIH1/UBE2G1/RNF138/MALT1/SKP1/UBE2D2/UBR2/UB<br>E3C/UBE2V2   | Molecular<br>Function |
| GO:00170<br>16 | Ras GTPase binding                                                           | 10/262 | 0.002469 | 0.07196  | RABGAP1L/ERC1/EXOC5/DAAM1/FMNL1/PAK2/IQGAP2/RHOBTB3/MAPKAP1/DOCK11                         | Molecular<br>Function |
| GO:00167<br>80 | phosphotransferase<br>activity; for other<br>substituted phosphate<br>groups | 3/262  | 0.003114 | 0.084276 | CEPT1/SGMS1/PIGN                                                                           | Molecular<br>Function |
| GO:00085<br>65 | protein transporter<br>activity                                              | 6/262  | 0.003337 | 0.0843   | RAB4A/AP2A2/SEC62/ASCC3/SEC63/NUPL2                                                        | Molecular<br>Function |
| GO:00353<br>26 | enhancer binding                                                             | 6/262  | 0.003912 | 0.092644 | FLI1/SMAD2/REL/BACH1/LEF1/BACH2                                                            | Molecular<br>Function |
| GO:00168<br>74 | ligase activity                                                              | 14/262 | 0.006715 | 0.123046 | TRIM33/TARS2/RFWD2/CBL/MYCBP2/ARIH1/UBE2G1/RNF138/UBA2/MARCH7/SUCLG2/UBE2<br>D2/UBR2/UBE3C | Molecular<br>Function |
| GO:00316<br>25 | ubiquitin protein ligase<br>binding                                          | 10/262 | 0.006819 | 0.123046 | SKI/CCT2/ARIH1/UBE2G1/SMAD2/USP25/SMAD5/PDE4D/UBE2V2/DNAJA1                                | Molecular<br>Function |
| GO:00050       | transforming growth                                                          | 2/262  | 0.01025  | 0.146773 | SMAD2/SMAD5                                                                                | Molecular             |

|                |                                                                                                                        |       |          |          |                                         |                       |
|----------------|------------------------------------------------------------------------------------------------------------------------|-------|----------|----------|-----------------------------------------|-----------------------|
| 72             | factor beta receptor;<br>cytoplasmic mediator<br>activity                                                              |       |          |          |                                         | Function              |
| GO:00156<br>43 | toxic substance<br>binding                                                                                             | 2/262 | 0.012398 | 0.161238 | PHAX/TMEM181                            | Molecular<br>Function |
| GO:00434<br>22 | protein kinase B<br>binding                                                                                            | 2/262 | 0.012398 | 0.161238 | CCDC88A/APPL1                           | Molecular<br>Function |
| GO:00321<br>83 | SUMO binding                                                                                                           | 2/262 | 0.014724 | 0.161238 | USPL1/USP25                             | Molecular<br>Function |
| GO:00704<br>10 | co-SMAD binding                                                                                                        | 2/262 | 0.014724 | 0.161238 | TRIM33/SMAD2                            | Molecular<br>Function |
| GO:00055<br>47 | phosphatidylinositol-3;<br>4,5-trisphosphate<br>binding                                                                | 3/262 | 0.014912 | 0.161238 | IQGAP2/ASAP1/MAPKAP1                    | Molecular<br>Function |
| GO:00047<br>22 | protein<br>serine/threonine<br>phosphatase activity                                                                    | 4/262 | 0.015611 | 0.161238 | PTEN/CTDPI/ILKAP/CDC14B                 | Molecular<br>Function |
| GO:00012<br>27 | transcriptional<br>repressor activity;<br>RNA polymerase II<br>transcription<br>regulatory region<br>sequence-specific | 7/262 | 0.015837 | 0.161238 | CREBBP/MNT/SP3/NFATC2/BACH1/SATB1/BACH2 | Molecular<br>Function |

|                |                                                    |        |          |          |                                                                             |                       |
|----------------|----------------------------------------------------|--------|----------|----------|-----------------------------------------------------------------------------|-----------------------|
|                | binding                                            |        |          |          |                                                                             |                       |
| GO:00082<br>34 | cysteine-type peptidase activity                   | 7/262  | 0.01783  | 0.173245 | USP1/USPL1/MALT1/CFLAR/USP25/OTULIN/SEN6                                    | Molecular<br>Function |
| GO:00046<br>74 | protein serine/threonine kinase activity           | 13/262 | 0.020928 | 0.193426 | AKT3/PKN2/ATM/CDKL1/TAOK1/STK39/LTBP1/DYRK1A/PAK2/MAP3K5/STK38/PRKAG2/CDK14 | Molecular<br>Function |
| GO:00040<br>12 | phospholipid-translocating ATPase activity         | 2/262  | 0.025687 | 0.202795 | ATP8B4/ATP9B                                                                | Molecular<br>Function |
| GO:00152<br>78 | calcium-release channel activity                   | 2/262  | 0.025687 | 0.202795 | TPCN1/RASA3                                                                 | Molecular<br>Function |
| GO:00428<br>09 | vitamin D receptor binding                         | 2/262  | 0.025687 | 0.202795 | MED17/MED13                                                                 | Molecular<br>Function |
| GO:00314<br>89 | myosin V binding                                   | 2/262  | 0.028814 | 0.214099 | RAB27A/RAB27B                                                               | Molecular<br>Function |
| GO:00436<br>21 | protein self-association                           | 3/262  | 0.030084 | 0.216943 | CCDC88C/MALT1/DYRK1A                                                        | Molecular<br>Function |
| GO:00036<br>82 | chromatin binding                                  | 13/262 | 0.033452 | 0.231622 | ASH1L/SKI/FLI1/CREBBP/MNT/SMAD2/SP3/SATB2/REL/NFATC2/SATB1/LEF1/AUTS2       | Molecular<br>Function |
| GO:00312<br>10 | phosphatidylcholine binding                        | 2/262  | 0.035493 | 0.231622 | NF1/ESYT2                                                                   | Molecular<br>Function |
| GO:00167<br>63 | transferase activity; transferring pentosyl groups | 3/262  | 0.035762 | 0.231622 | XYLT1/PARP8/PARP12                                                          | Molecular<br>Function |

|            |                    |       |          |          |                               |                    |
|------------|--------------------|-------|----------|----------|-------------------------------|--------------------|
| GO:0000149 | SNARE binding      | 5/262 | 0.036673 | 0.231622 | RAB4A/VPS11/SCFD1/GOSR1/TXLNG | Molecular Function |
| GO:0017124 | SH3 domain binding | 5/262 | 0.036673 | 0.231622 | DNAJC6/CBL/FMN1/PDE4D/SH3KBP1 | Molecular Function |
| GO:0019003 | GDP binding        | 3/262 | 0.046357 | 0.255354 | RAB4A/RAB27A/RAB27B           | Molecular Function |

**Table 3. GO enrichment analysis about lncRNA**

| GO_ID      | Description                    | GeneRatio | pvalue   | qvalue   | geneID                                                                                                | GO_domain          |
|------------|--------------------------------|-----------|----------|----------|-------------------------------------------------------------------------------------------------------|--------------------|
| GO:0030670 | phagocytic vesicle membrane    | 9/978     | 0.002228 | 0.742977 | ATP6V0E2/HLA-A/ANXA3/CYBB/HLA-E/RAB22A/RAB43/RILP/TLR6                                                | Cellular Component |
| GO:0071437 | invadopodium                   | 4/978     | 0.003168 | 0.742977 | SVIL/AFAP1L1/FSCN1/NOX1                                                                               | Cellular Component |
| GO:0031201 | SNARE complex                  | 8/978     | 0.005619 | 0.742977 | BET1L/STXBP5/NAPA/BNIP1/CPLX1/SNAP47/VAMP2/VTI1A                                                      | Cellular Component |
| GO:0005875 | microtubule associated complex | 16/978    | 0.005827 | 0.742977 | DISC1/KIF20B/WDR81/ACTR10/ACTR1A/ACTR1B/DNAH8/DNAH9/DNAL4/DYNLL1/HAUS5/KIF21A/KLC2/NDEL1/SPTBN5/STAU1 | Cellular Component |
| GO:0045335 | phagocytic vesicle             | 10/978    | 0.011207 | 0.96332  | ATP6V0E2/HLA-A/SRGA2/ANXA3/CYBB/HLA-E/RAB22A/RAB43/RILP/TLR6                                          | Cellular Component |
| GO:0030684 | preribosome                    | 7/978     | 0.017091 | 0.96332  | RRP1/IMP4/MPHOSPH10/PIN4/RPS7/RRP1B/WDR3                                                              | Cellular Component |
| GO:00058   | proteasome core                | 4/978     | 0.021834 | 0.96332  | PSMA3/PSMB8/PSMA1/PSMB9                                                                               | Cellular           |

|                |                  |       |          |         |                               |                       |
|----------------|------------------|-------|----------|---------|-------------------------------|-----------------------|
| 39             | complex          |       |          |         |                               | Component             |
| GO:00081<br>80 | COP9 signalosome | 5/978 | 0.036991 | 0.96332 | BASP1/DYNLL1/GPS1/HSPA5/TMOD1 | Cellular<br>Component |
| GO:00306<br>86 | 90S preribosome  | 4/978 | 0.040278 | 0.96332 | IMP4/MPHOSPH10/RPS7/WDR3      | Cellular<br>Component |
