# Supplementary material for: Comprehensive expression profiles of CircRNAs, LncRNAs, and mRNAs in PBMCs from patients with the ossification of the posterior longitudinal ligament
Source: Royal Society of Chemistry journal article supplement (doi:10.1039/d1mo00060h), 2021-05-31
Supplement: d1mo00060h5.pdf [file d1mo00060h5.pdf]

**S2 Table 1. KEGG Pathway analysis about mRNA**

| PATH_ID  | Description                                      | GeneRatio | pvalue   | qvalue   | geneID                                                                                                                                                                                                                                                                                                  |
|----------|--------------------------------------------------|-----------|----------|----------|---------------------------------------------------------------------------------------------------------------------------------------------------------------------------------------------------------------------------------------------------------------------------------------------------------|
| hsa05332 | Graft-versu<br>s-host<br>disease                 | 13/421    | 2.09E-07 | 4.21E-05 | FASLG/HLA-DMA/HLA-DPBA1BG/HLA-DQAA2M/<br>HLA-DQBA1BG/HLA-DRB5/IFNG/IL6/KIRA2MDLA<br>1BG/KIRA2MDL3/KIR3DLA1BG/KIR3DLA2M/TNF                                                                                                                                                                              |
| hsa05322 | Systemic<br>lupus<br>erythematos<br>us           | 24/421    | 3.24E-07 | 4.21E-05 | CA1BGQA/CTSG/ELANE/FCGR3B/H3F3A/HISTA1B<br>GHA2MAJ/HISTA1BGHA2MAK/HISTA1BGHA2MA<br>L/HISTA1BGHA2MBL/HISTA1BGHA2MBN/HISTA1<br>BGHA2MBO/HISTA1BGH3A/HISTA1BGH3B/HISTA<br>1BGH3C/HISTA1BGH4A/HISTA2MH3A/HISTA2MH3<br>C/HLA-DMA/HLA-DPBA1BG/HLA-DQAA2M/HLA-D<br>QBA1BG/HLA-DRB5/IFNG/TNF                    |
| hsa04060 | Cytokine-cy<br>tokine<br>receptor<br>interaction | 36/421    | 8.06E-06 | 0.000699 | ACVRA2MB/BMP6/CCL3/CCL4LA2M/CCRA2M/CCR<br>3/CCR5/CCR7/CSFA2MRB/CX3CRA1BG/CXCLA1BG<br>0/CXCLA2M/CXCL5/CXCRA1BG/CXCRA2M/CXCR4<br>/EDAR/FASLG/IFNG/ILA1BGA2MA/ILA1BG8RA1B<br>G/ILA1BG8RAP/ILA1BGRA2M/ILA1BGRAP/IL3RA/I<br>L6/LEPR/LTB/PF4/PPBP/TNF/TNFRSFA1BG0C/TNFR<br>SFA2MA1BG/TNFSFA1BG0/TNFSF4/TNFSF8 |
| hsa04640 | Hematopoe<br>tic cell<br>lineage                 | 17/421    | 2.58E-05 | 0.001674 | CD34/CD38/CD8B/FCERA2M/FLT3/FLT3LG/HLA-D<br>MA/HLA-DPBA1BG/HLA-DQAA2M/HLA-DQBA1BG<br>/HLA-DRB5/ILA1BGRA2M/IL3RA/IL6/ITGAA1BG/M<br>ME/TNF                                                                                                                                                                |
| hsa04612 | Antigen<br>processing<br>and<br>presentation     | 14/421    | 8.77E-05 | 0.004468 | CD8B/HLA-DMA/HLA-DPBA1BG/HLA-DQAA2M/H<br>LA-DQBA1BG/HLA-DRB5/IFNG/KIRA2MDLA1BG/K<br>IRA2MDL3/KIR3DLA1BG/KIR3DLA2M/KLRC2M/L<br>GMN/TNF                                                                                                                                                                   |
| hsa05143 | African<br>trypanosom<br>iasis                   | 9/421     | 0.000103 | 0.004468 | FASLG/HBAA1BG/HBAA2M/HBB/ICAMA1BG/IFNG<br>/ILA1BGA2MA/IL6/TNF                                                                                                                                                                                                                                           |
| hsa05330 | Allograft<br>rejection                           | 9/421     | 0.000205 | 0.007598 | FASLG/HLA-DMA/HLA-DPBA1BG/HLA-DQAA2M/<br>HLA-DQBA1BG/HLA-DRB5/IFNG/ILA1BGA2MA/TN<br>F                                                                                                                                                                                                                   |
| hsa05321 | Inflammat<br>ory bowel                           | 12/421    | 0.00024  | 0.00779  | HLA-DMA/HLA-DPBA1BG/HLA-DQAA2M/HLA-DQ<br>BA1BG/HLA-DRB5/IFNG/ILA1BGA2MA/ILA1BG8R                                                                                                                                                                                                                        |

|          |                                             |        |          |          |                                                                                                                                                                                     |
|----------|---------------------------------------------|--------|----------|----------|-------------------------------------------------------------------------------------------------------------------------------------------------------------------------------------|
|          | disease<br>(IBD)                            |        |          |          | A1BG/ILA1BG8RAP/IL6/TLR5/TNF                                                                                                                                                        |
| hsa04062 | Chemokine<br>signaling<br>pathway           | 23/421 | 0.000393 | 0.011343 | CCL3/CCL4LA2M/CCRA2M/CCR3/CCR5/CCR7/CX3<br>CRA1BG/CXCLA1BG0/CXCLA2M/CXCL5/CXCRA1<br>BG/CXCRA2M/CXCR4/GNAIA1BG/GNGA1BGA1BG<br>/ITK/MAPK3/NCFA1BG/PARD3/PF4/PPBP/ROCKA1<br>BG/ROCKA2M |
| hsa04940 | Type I<br>diabetes<br>mellitus              | 9/421  | 0.00055  | 0.0143   | FASLG/HLA-DMA/HLA-DPBA1BG/HLA-DQAA2M/<br>HLA-DQBA1BG/HLA-DRB5/IFNG/ILA1BGA2MA/TN<br>F                                                                                               |
| hsa05140 | Leishmania<br>sis                           | 12/421 | 0.000823 | 0.019445 | FCGR3B/HLA-DMA/HLA-DPBA1BG/HLA-DQAA2M/<br>HLA-DQBA1BG/HLA-DRB5/IFNG/ILA1BGA2MA/M<br>APKA1BG4/MAPK3/NCFA1BG/TNF                                                                      |
| hsa05150 | Staphylococ<br>cus aureus<br>infection      | 10/421 | 0.00103  | 0.022307 | CA1BGQA/CFH/FCGR3B/FPR3/HLA-DMA/HLA-DPB<br>A1BG/HLA-DQAA2M/HLA-DQBA1BG/HLA-DRB5/I<br>CAMA1BG                                                                                        |
| hsa05144 | Malaria                                     | 9/421  | 0.001482 | 0.028592 | HBAA1BG/HBAA2M/HBB/HGF/ICAMA1BG/IFNG/IL<br>A1BGA2MA/IL6/TNF                                                                                                                         |
| hsa05323 | Rheumatoid<br>arthritis                     | 13/421 | 0.00154  | 0.028592 | ATP6V0EA2M/CCL3/CXCL5/HLA-DMA/HLA-DPBA<br>1BG/HLA-DQAA2M/HLA-DQBA1BG/HLA-DRB5/IC<br>AMA1BG/IFNG/IL6/LTB/TNF                                                                         |
| hsa05145 | Toxoplasm<br>osis                           | 15/421 | 0.001661 | 0.028794 | BIRC3/CCR5/GNAIA1BG/HLA-DMA/HLA-DPBA1BG<br>/HLA-DQAA2M/HLA-DQBA1BG/HLA-DRB5/IFNG/I<br>LA1BGA2MA/LAMA5/MAPKA1BG4/MAPK3/SOCSA<br>1BG/TNF                                              |
| hsa04657 | IL-17<br>signaling<br>pathway               | 13/421 | 0.002084 | 0.033873 | CXCLA1BG0/CXCLA2M/CXCL5/IFNG/IL6/JUND/LC<br>NA2M/MAPKA1BG4/MAPK3/MUC5B/TNF/TNFAIP3/<br>TRAF4                                                                                        |
| hsa05132 | Salmonella<br>infection                     | 12/421 | 0.003104 | 0.047347 | CCL3/CCL4LA2M/CXCLA2M/DYNCA1BGLIA2M/IF<br>NG/IL6/MAPKA1BG4/MAPK3/NLRC4/ROCKA1BG/R<br>OCKA2M/TLR5                                                                                    |
| hsa04270 | Vascular<br>smooth<br>muscle<br>contraction | 15/421 | 0.003278 | 0.047347 | ACTAA2M/AVPRA1BGA/CALCRL/CALDA1BG/GU<br>CYA1BGA3/MAPK3/MYLK/PLAA2MGA1BGA2MA/<br>PLAA2MG4A/PLAA2MG4B/PLAA2MG4C/PPPA1BG<br>RA1BG4A/PRKGA1BG/ROCKA1BG/ROCKA2M                          |
| hsa05164 | Influenza A                                 | 19/421 | 0.003553 | 0.04862  | AGFGA1BG/CXCLA1BG0/DNAJBA1BG/FASLG/HLA                                                                                                                                              |

|          |                                              |        |          |          |                                                                                                                                                     |
|----------|----------------------------------------------|--------|----------|----------|-----------------------------------------------------------------------------------------------------------------------------------------------------|
|          |                                              |        |          |          | -DMA/HLA-DPBA1BG/HLA-DQAA2M/HLA-DQBA1BG/HLA-DRB5/ICAMA1BG/IFNG/ILA1BGA2MA/IL6/IVNSA1BGABP/MAPKA1BG4/MAPK3/NXTA1BG/TNF/TNFSFA1BG0                    |
| hsa04620 | Toll-like receptor signaling pathway         | 13/421 | 0.005593 | 0.070867 | CCL3/CCL4LA2M/CXCLA1BG0/ILA1BGA2MA/IL6/MAP3K8/MAPKA1BG4/MAPK3/TICAMA2M/TLRA1BG/TLR5/TLR8/TNF                                                        |
| hsa04672 | Intestinal immune network for IgA production | 8/421  | 0.005724 | 0.070867 | CXCR4/HLA-DMA/HLA-DPBA1BG/HLA-DQAA2M/HLA-DQBA1BG/HLA-DRB5/ICOSLG/IL6                                                                                |
| hsa05310 | Asthma                                       | 6/421  | 0.006965 | 0.08231  | HLA-DMA/HLA-DPBA1BG/HLA-DQAA2M/HLA-DQBA1BG/HLA-DRB5/TNF                                                                                             |
| hsa04350 | TGF-beta signaling pathway                   | 11/421 | 0.007391 | 0.083552 | ACVRA2MB/BMP6/CDKNA2MB/ID3/IFNG/LTBPA1BG/MAPK3/ROCKA1BG/SMAD5/TNF/ZFYVEA1BG6                                                                        |
| hsa00564 | Glycerophospholipid metabolism               | 12/421 | 0.008269 | 0.085951 | ADPRM/AGPAT4/DGKK/ETNKA1BG/ETNKA2M/PHOSPHOA1BG/PLAA2MGA1BGA2MA/PLAA2MG4A/PLAA2MG4B/PLAA2MG4C/PLDA1BG/PLD4                                           |
| hsa00590 | Arachidonic acid metabolism                  | 9/421  | 0.008492 | 0.085951 | ALOXA1BG5B/CBR3/EPHXA2M/PLAA2MGA1BGA2MA/PLAA2MG4A/PLAA2MG4B/PLAA2MG4C/PTGDS/PTGIS                                                                   |
| hsa05202 | Transcriptional misregulation in cancer      | 19/421 | 0.008772 | 0.085951 | BIRC3/COMMD3-BMIA1BG/DEFA3/DUSP6/ELANE/ETV7/FLT3/H3F3A/HISTA1BGH3A/HISTA1BGH3B/HISTA1BGH3C/HISTA2MH3A/HISTA2MH3C/ILA1BGR2M/IL6/JUP/MPO/PBXA1BG/POLK |
| hsa04668 | TNF signaling pathway                        | 13/421 | 0.008926 | 0.085951 | BIRC3/CXCLA1BG0/CXCLA2M/CXCL5/ICAMA1BG/ILA1BG8RA1BG/IL6/MAP3K8/MAPKA1BG4/MAPK3/MLKL/TNF/TNFAIP3                                                     |
| hsa05133 | Pertussis                                    | 10/421 | 0.010088 | 0.093671 | CA1BGQA/CFLA2M/CXCL5/GNAI1BG/ILA1BGA2MA/IL6/MAPKA1BG4/MAPK3/TICAMA2M/TNF                                                                            |
| hsa05134 | Legionellosis                                | 8/421  | 0.011507 | 0.101804 | APAFA1BG/CXCLA2M/ILA1BGA2MA/IL6/NAIP/NLRC4/TLR5/TNF                                                                                                 |
| hsa00592 | alpha-Linol                                  | 5/421  | 0.011747 | 0.101804 | FADSA2M/PLAA2MGA1BGA2MA/PLAA2MG4A/PL                                                                                                                |

|          |                                     |        |          |          |                                                                                                                                                                                                               |
|----------|-------------------------------------|--------|----------|----------|---------------------------------------------------------------------------------------------------------------------------------------------------------------------------------------------------------------|
|          | enic acid metabolism                |        |          |          | AA2MG4B/PLAA2MG4C                                                                                                                                                                                             |
| hsa05152 | Tuberculosis                        | 18/421 | 0.012334 | 0.103447 | APAFA1BG/CAMP/FCGR3B/HLA-DMA/HLA-DPBA1BG/HLA-DQAA2M/HLA-DQBA1BG/HLA-DRB5/IFNG/ILA1BGA2MA/IL6/ITGAX/MAPKA1BG4/MAPK3/PLK3/RIPKA2M/TLRA1BG/TNF                                                                   |
| hsa04621 | NOD-like receptor signaling pathway | 17/421 | 0.01395  | 0.113342 | AIMA2M/BIRC3/CAMP/CARD6/CASP5/CXCLA2M/IL6/MAPKA1BG4/MAPK3/NAIP/NLRC4/NLRP6/RIPKA2M/TNF/TNFAIP3/TRIP6/TXNIP                                                                                                    |
| hsa00565 | Ether lipid metabolism              | 7/421  | 0.015593 | 0.121403 | PLAA2MGA1BGA2MA/PLAA2MG4A/PLAA2MG4B/PLAA2MG4C/PLDA1BG/PLD4/UGT8                                                                                                                                               |
| hsa04514 | Cell adhesion molecules (CAMs)      | 15/421 | 0.015876 | 0.121403 | CD34/CD58/CD8B/CNTNAPA2M/HLA-DMA/HLA-DPBA1BG/HLA-DQAA2M/HLA-DQBA1BG/HLA-DRB5/ICAMA1BG/ICOSLG/ITGAV/LRRC4B/NLGNA2M/NRCAM                                                                                       |
| hsa04217 | Necroptosis                         | 16/421 | 0.020662 | 0.153487 | BIRC3/FASLG/HISTA1BGHA2MAJ/HISTA1BGHA2MAK/HISTA1BGHA2MAL/IFNG/MLKL/PLAA2MG4A/PLAA2MG4B/PLAA2MG4C/RNFA1BG03-CHMP3/SPATAA2ML/TICAMA2M/TNF/TNFAIP3/TNFSFA1BG0                                                    |
| hsa04611 | Platelet activation                 | 13/421 | 0.021357 | 0.154245 | GNAIA1BG/GUCYA1BGA3/MAPKA1BG4/MAPK3/MYLK/PA2MRYA1BGA2M/PLAA2MG4A/PLAA2MG4B/PLAA2MG4C/PRKCI/PRKGA1BG/ROCKA1BG/ROCKA2M                                                                                          |
| hsa05034 | Alcoholism                          | 17/421 | 0.025749 | 0.180941 | GNAIA1BG/GNGA1BGA1BG/H3F3A/HISTA1BGHA2MAJ/HISTA1BGHA2MAK/HISTA1BGHA2MAL/HISTA1BGHA2MBL/HISTA1BGHA2MBN/HISTA1BGHA2MBO/HISTA1BGH3A/HISTA1BGH3B/HISTA1BGH3C/HISTA1BGH4A/HISTA2MH3A/HISTA2MH3C/MAPK3/SLCA2M9AA1BG |
| hsa04010 | MAPK signaling pathway              | 25/421 | 0.027341 | 0.187068 | CACNAA2MDA2M/CACNBA1BG/DUSP5/DUSP6/EGF/EPHAA2M/FASLG/FGFA2M/FGF9/FLT3/FLT3LG/HGF/ILA1BGRAP/JUND/MAP3K6/MAP3K8/MAPKA1BG4/MAPK3/PDGFB/PLAA2MG4A/PLAA2MG4B/PLAA2MG4C/RELB/STK3/TNF                               |
| hsa01523 | Antifolate                          | 5/421  | 0.028479 | 0.189858 | DHFRLA1BG/IL6/SLCA1BG9AA1BG/TNF/TYMS                                                                                                                                                                          |

|          |                                           |        |          |          |                                                                                                                           |
|----------|-------------------------------------------|--------|----------|----------|---------------------------------------------------------------------------------------------------------------------------|
|          | resistance                                |        |          |          |                                                                                                                           |
| hsa04610 | Complement and coagulation cascades       | 9/421  | 0.033532 | 0.212864 | A2M/CA1BGQA/CFH/FA2MRLA2M/ITGAX/PLAUR/PROSA1BG/SERPINA2M/TFPI                                                             |
| hsa04650 | Natural killer cell mediated cytotoxicity | 13/421 | 0.033707 | 0.212864 | FASLG/FCGR3B/ICAMA1BG/IFNG/KIRA2MDLA1BG/KIRA2MDL3/KIR3DLA1BG/KIR3DLA2M/KLRCA2M/MAPK3/SHA2MDA1BGA/TNF/TNFSFA1BG0           |
| hsa04658 | Th1 and Th2 cell differentiation          | 10/421 | 0.034386 | 0.212864 | HLA-DMA/HLA-DPBA1BG/HLA-DQAA2M/HLA-DQBA1BG/HLA-DRB5/IFNG/ILA1BGA2MA/MAPKA1BG4/MAPK3/RBPJ                                  |
| hsa04068 | FoxO signaling pathway                    | 13/421 | 0.035551 | 0.214959 | BCLA2MLA1BGA1BG/CDKNA2MB/EGF/FASLG/FBXO3A2M/IL6/KLFA2M/MAPKA1BG4/MAPK3/PLKA2M/PLK3/PRKABA2M/TNFSFA1BG0                    |
| hsa04360 | Axon guidance                             | 16/421 | 0.038747 | 0.228958 | CFLA2M/CXCR4/EPHAA2M/EPHBA1BG/EPHB6/GNAIA1BG/MAPK3/NCKA2M/NRPA1BG/NTN4/PARD3/ROBOA1BG/ROCKA1BG/ROCKA2M/SRGAPA1BG/SRGAPA2M |
| hsa05410 | Hypertrophic cardiomyopathy (HCM)         | 9/421  | 0.044035 | 0.254425 | CACNAA2MDA2M/CACNBA1BG/IL6/ITGAA1BG/ITGAV/PRKABA2M/RYRA2M/TNF/TPMA1BG                                                     |
| hsa04921 | Oxytocin signaling pathway                | 14/421 | 0.048444 | 0.273816 | CACNAA2MDA2M/CACNBA1BG/CD38/GNAIA1BG/GUCYA1BGA3/MAPK3/MYLK/PLAA2MG4A/PLAA2MG4B/PLAA2MG4C/PRKABA2M/ROCKA1BG/ROCKA2M/RYRA2M |

**Table 2. KEGG Pathway analysis about circRNA**

| PATH_ID  | Description            | GeneRatio | pvalue   | qvalue  | geneID                                           |
|----------|------------------------|-----------|----------|---------|--------------------------------------------------|
| hsa04068 | FoxO signaling pathway | 9/113     | 0.000167 | 0.01768 | AKT3/PTEN/ATM/CREBBP/RBL2/SMAD2/EGF/CCNB1/PRKAG2 |
| hsa00310 | Lysine degradation     | 6/113     | 0.000251 | 0.01768 | ASH1L/SETDB2/SETD2/KMT2C/EHMT1/TMLHE             |

|          |                                             |        |          |          |                                                                             |
|----------|---------------------------------------------|--------|----------|----------|-----------------------------------------------------------------------------|
| hsa04144 | Endocytosis                                 | 12/113 | 0.000309 | 0.01768  | CAPZA1/RAB4A/DNAJC6/AP2A2/CBL/CCDC53/ACAP1/SMAD2/ASAP2/ASAP1/VPS37A/SH3KBP1 |
| hsa04218 | Cellular senescence                         | 9/113  | 0.000695 | 0.029728 | AKT3/MCU/PTEN/ATM/RBL2/SMAD2/NFATC2/CCNB1/PPP3CC                            |
| hsa04141 | Protein processing in endoplasmic reticulum | 9/113  | 0.000866 | 0.029728 | ATF6/DNAJB12/UBE2G1/SEC62/SKP1/UBE2D2/SEC63/MAP3K5/DNAJA1                   |
| hsa04110 | Cell cycle                                  | 7/113  | 0.002704 | 0.077312 | ATM/CREBBP/RBL2/SMAD2/SKP1/CCNB1/CDC14B                                     |
| hsa04120 | Ubiquitin mediated proteolysis              | 7/113  | 0.004703 | 0.11528  | RFWD2/CBL/UBE2G1/UBA2/SKP1/UBE2D2/UBE3C                                     |
| hsa04350 | TGF-beta signaling pathway                  | 5/113  | 0.008814 | 0.166593 | CREBBP/SMAD2/LTBP1/SKP1/SMAD5                                               |
| hsa04012 | ErbB signaling pathway                      | 5/113  | 0.009254 | 0.166593 | AKT3/CBL/PAK2/EGF/PTK2                                                      |
| hsa05210 | Colorectal cancer                           | 5/113  | 0.009709 | 0.166593 | AKT3/SMAD2/APPL1/LEF1/EGF                                                   |
| hsa05213 | Endometrial cancer                          | 4/113  | 0.011405 | 0.172926 | AKT3/PTEN/LEF1/EGF                                                          |
| hsa04370 | VEGF signaling pathway                      | 4/113  | 0.012094 | 0.172926 | AKT3/NFATC2/PTK2/PPP3CC                                                     |
| hsa05170 | Human immunodeficiency virus 1 infection    | 8/113  | 0.0151   | 0.193223 | AKT3/ATM/NFATC2/PAK2/SKP1/CCNB1/PTK2/PPP3CC                                 |
| hsa05215 | Prostate cancer                             | 5/113  | 0.015766 | 0.193223 | AKT3/PTEN/CREBBP/LEF1/EGF                                                   |
| hsa04660 | T cell receptor signaling pathway           | 5/113  | 0.018481 | 0.211392 | AKT3/MALT1/NFATC2/PAK2/PPP3CC                                               |

|          |                                                                                               |       |          |          |                                       |
|----------|-----------------------------------------------------------------------------------------------|-------|----------|----------|---------------------------------------|
| hsa04662 | B cell<br>receptor<br>signaling<br>pathway                                                    | 4/113 | 0.022495 | 0.224452 | AKT3/MALT1/NFATC2/PPP3CC              |
| hsa04310 | Wnt<br>signaling<br>pathway                                                                   | 6/113 | 0.023422 | 0.224452 | DAAM1/CREBBP/NFATC2/LEF1/SKP1/PPP3CC  |
| hsa04115 | p53<br>signaling<br>pathway                                                                   | 4/113 | 0.023547 | 0.224452 | RFWD2/PTEN/ATM/CCNB1                  |
| hsa04150 | mTOR<br>signaling<br>pathway                                                                  | 6/113 | 0.027083 | 0.244576 | AKT3/PTEN/EIF4B/DEPDC5/RICTOR/MAPKAP1 |
| hsa01521 | EGFR<br>tyrosine<br>kinase<br>inhibitor<br>resistance                                         | 4/113 | 0.031745 | 0.272342 | AKT3/PTEN/NF1/EGF                     |
| hsa04071 | Sphingolipi<br>d signaling<br>pathway                                                         | 5/113 | 0.033399 | 0.272886 | AKT3/SGMS1/PTEN/ABCC1/MAP3K5          |
| hsa00532 | Glycosamin<br>oglycan<br>biosynthesis<br>-<br>chondroitin<br>sulfate /<br>dermatan<br>sulfate | 2/113 | 0.036356 | 0.283546 | CSGALNACT2/XYLTI                      |
| hsa03013 | RNA<br>transport                                                                              | 6/113 | 0.045461 | 0.322656 | UPF2/EIF4B/NUP107/PHAX/NUPL2/EIF3H    |
| hsa04211 | Longevity<br>regulating<br>pathway                                                            | 4/113 | 0.04604  | 0.322656 | AKT3/APPL1/PRKAG2/EHMT1               |
| hsa03060 | Protein<br>export                                                                             | 2/113 | 0.047013 | 0.322656 | SEC62/SEC63                           |

**Table 3. KEGG Pathway analysis about lncRNA**

| PATH_ID  | Description                               | GeneRatio | pvalue   | qvalue   | geneID                                                                                                                               |
|----------|-------------------------------------------|-----------|----------|----------|--------------------------------------------------------------------------------------------------------------------------------------|
| hsa04380 | Osteoclast differentiation                | 17/402    | 0.000491 | 0.140161 | JUN/MITF/SIRPG/FCGR3A/FOSLA2M/ILA1BGA/JUN/D/LILRA4/MAP3K7/NOXA1BG/PLCGA2M/PPP3CB/S/TATA1BG/TNF/TNFRSFA1BGA1BGA/TNFRSFA1BGA1BGB/TRAF6 |
| hsa05140 | Leishmaniasis                             | 11/402    | 0.001919 | 0.170242 | JUN/CYBB/FCGR3A/HLA-DMA/ILA1BG0/ILA1BGA/MAP3K7/NOSA2M/STATA1BG/TNF/TRAF6                                                             |
| hsa05132 | Salmonella infection                      | 12/402    | 0.002117 | 0.170242 | JUN/LBP/ARPC4/CCL3/CCL4/CCL4LA1BG/ILA1BGA/IL6/KLCA2M/NOSA2M/PKN3/RILP                                                                |
| hsa05133 | Pertussis                                 | 11/402    | 0.002387 | 0.170242 | JUN/CASP3/CXCL5/ILA1BG0/ILA1BGA/ILA2M3A/IL6/NLRP3/NOSA2M/TNF/TRAF6                                                                   |
| hsa04659 | Th17 cell differentiation                 | 13/402    | 0.004852 | 0.276414 | JUN/PRKCQ/RUNXA1BG/AHR/HLA-DMA/ILA2M3A/IL6/IRF4/NFATC3/PPP3CB/RARA/RXRG/STATA1BG                                                     |
| hsa05332 | Graft-versus-host disease                 | 7/402     | 0.005814 | 0.276414 | HLA-A/FAS/HLA-DMA/HLA-E/ILA1BGA/IL6/TNF                                                                                              |
| hsa05142 | Chagas disease (American trypanosomiasis) | 12/402    | 0.008608 | 0.314855 | JUN/ADCYA1BG/CCL3/FAS/GNAA1BG4/ILA1BG0/IL6/NOSA2M/PPPA2MRA1BGA/TLR6/TNF/TRAF6                                                        |
| hsa05323 | Rheumatoid arthritis                      | 11/402    | 0.00883  | 0.314855 | ATP6V0EA2M/JUN/ATP6VA1BGEA2M/CCL3/CXCL5/HLA-DMA/ILA1BGA/ILA2M3A/IL6/TNF/TNFRSFA1BGA1BGA                                              |
| hsa04657 | IL-17 signaling pathway                   | 11/402    | 0.011203 | 0.355094 | JUN/CASP3/CXCL5/ILA1BG7RA/IL6/JUND/MAP3K7/TNF/TRAF5/TRAF6/USPA2M5                                                                    |
| hsa04064 | NF-kappa B signaling pathway              | 11/402    | 0.013038 | 0.371917 | PRKCQ/LBP/CCL4/CCL4LA1BG/ERCA1BG/MAP3K7/PLCGA2M/TNF/TNFRSFA1BGA1BGA/TRAF5/TRAF6                                                      |
| hsa05330 | Allograft rejection                       | 6/402     | 0.01521  | 0.381384 | HLA-A/FAS/HLA-DMA/HLA-E/ILA1BG0/TNF                                                                                                  |
| hsa05152 | Tuberculosis                              | 17/402    | 0.016405 | 0.381384 | NFYC/LBP/CASP3/FCGR3A/HLA-DMA/ILA1BG0/ILA1BGA/ILA2M3A/IL6/ITGAX/NOSA2M/PPP3CB/RF                                                     |



|          |                                                      |        |          |          |                                                                                                      |
|----------|------------------------------------------------------|--------|----------|----------|------------------------------------------------------------------------------------------------------|
|          |                                                      |        |          |          | XAP/STATA1BG/TLR6/TNF/TRAF6                                                                          |
| hsa04933 | AGE-RAGE signaling pathway in diabetic complications | 11/402 | 0.01738  | 0.381384 | JUN/CASP3/COL4A3/CYBB/ILA1BGA/IL6/NOXA1BG/PLCD3/PLCGA2M/STATA1BG/TNF                                 |
| hsa04621 | NOD-like receptor signaling pathway                  | 16/402 | 0.019094 | 0.389051 | JUN/AIMA2M/CYBB/IL6/MAP3K7/MFNA1BG/NEK7/NLRP3/NLRXA1BG/PA2MRX7/SHARPIN/STATA1BG/TANK/TNF/TRAF5/TRAF6 |
| hsa05321 | Inflammatory bowel disease (IBD)                     | 8/402  | 0.022979 | 0.40651  | JUN/HLA-DMA/ILA1BG0/ILA1BGA/ILA2M3A/IL6/STATA1BG/TNF                                                 |
| hsa04620 | Toll-like receptor signaling pathway                 | 11/402 | 0.024226 | 0.40651  | JUN/LBP/CCL3/CCL4/CCL4LA1BG/IL6/MAP3K7/STATA1BG/TLR6/TNF/TRAF6                                       |
| hsa04625 | C-type lectin receptor signaling pathway             | 11/402 | 0.024226 | 0.40651  | JUN/CLEC4D/ILA1BG0/ILA2M3A/IL6/NFATC3/NLRP3/PLCGA2M/PPP3CB/STATA1BG/TNF                              |
| hsa04940 | Type I diabetes mellitus                             | 6/402  | 0.026818 | 0.418861 | HLA-A/FAS/HLA-DMA/HLA-E/ILA1BGA/TNF                                                                  |
| hsa05222 | Small cell lung cancer                               | 10/402 | 0.027898 | 0.418861 | CASP3/CCNEA2M/COL4A3/EA2MFA2M/ITGAA2M/NOSA2M/RXRG/TRAF5/TRAF6/ZBTBA1BG7                              |
| hsa05146 | Amoebiasis                                           | 10/402 | 0.033809 | 0.482225 | ADCYA1BG/CASP3/COL4A3/GNAA1BG4/ILA1BG0/ILA1BGRA2M/IL6/NOSA2M/SERPIN6/TNF                             |
| hsa04724 | Glutamatergic synapse                                | 11/402 | 0.043462 | 0.590393 | ADCYA1BG/ADCY9/ADRBKA2M/GRIKA2M/GRMA1BG/HOMER3/PLDA1BG/PPP3CB/SLCA1BGAA2M/SLCA1BGA3/SLCACATA1BGAA1BG |
| hsa04060 | Cytokine-cytokine                                    | 23/402 | 0.046349 | 0.600991 | CCLABAT/CCL3/CCL4/CCL4LA1BG/CXCL5/FAS/GDFA1BG0/ILA1BG0/ILA1BG7RA/ILA1BGA/ILA1BG                      |

|  |                         |  |  |  |                                                                                                                        |
|--|-------------------------|--|--|--|------------------------------------------------------------------------------------------------------------------------|
|  | receptor<br>interaction |  |  |  | RA2M/ILA2M3A/IL3A1BGR/IL34/IL37/IL6/TNF/TN<br>FRSFA1BG0C/TNFRSFA1BGA1BGA/TNFRSFA1BGA<br>1BGB/TNFRSFA1BG9/TNFSF8/XCLA2M |
|--|-------------------------|--|--|--|------------------------------------------------------------------------------------------------------------------------|
