# Supplementary material for: Comprehensive expression profiles of CircRNAs, LncRNAs, and mRNAs in PBMCs from patients with the ossification of the posterior longitudinal ligament
Source: Royal Society of Chemistry journal article supplement (doi:10.1039/d1mo00060h), 2021-05-31
Supplement: d1mo00060h6.pdf [file d1mo00060h6.pdf]

**Supplementary Table S3: Details of the study subjects**

|             | non- OPLL patients | OPLL patients         |
|-------------|--------------------|-----------------------|
| Number      | 3                  | 3                     |
| Age, years  | 55.3±5.5           | 63±4.58 <sup>a</sup>  |
| Male/Female | 1/2                | 1/2 <sup>a</sup>      |
| BMI         | 22.1±0.6           | 21.7±0.9 <sup>a</sup> |

OPLL, ossification of the posterior longitudinal ligament; BMI, body mass index. <sup>a</sup>, indicates  $P < 0.05$  compared to the healthy donor group. Data are presented as the mean ± SD.
